1 **Fine-tuning of SUMOylation modulates drought tolerance**

2 Xuewei Li<sup>1</sup>, Shuangxi Zhou<sup>2</sup>, Liyuan Lu<sup>1</sup>, Huan Dang<sup>1</sup>, Zeyuan Liu<sup>1</sup>, Huimin Li<sup>1</sup>,  
3 Baohua Chu<sup>1</sup>, Pengxiang Chen<sup>1</sup>, Ziqing Ma<sup>1</sup>, Shuang Zhao<sup>1</sup>, Steve van Nocker<sup>3</sup>,  
4 Fengwang Ma<sup>1\*</sup>, Qingmei Guan<sup>1\*</sup>

5

6 <sup>1</sup>State Key Laboratory of Crop Stress Biology for Arid Areas/Shaanxi Key Laboratory  
7 of Apple, College of Horticulture, Northwest A&F University, Yangling, Shaanxi  
8 712100, China

9 <sup>2</sup>The New Zealand Institute for Plant and Food Research Ltd., Hawke's Bay 4130,  
10 New Zealand.

11 <sup>3</sup>Department of Horticulture, Michigan , State University, 1066 Bogue St, East  
12 Lansing, MI 48824, USA

13

14 \*To whom correspondence should be addressed:

15 Qingmei Guan (email: [qguan@nwafu.edu.cn](mailto:qguan@nwafu.edu.cn)).

16 Fengwang Ma (email: [fwm64@nwafu.edu.cn](mailto:fwm64@nwafu.edu.cn))

17

18 Running title: SUMOylation regulates drought tolerance

19

20

21

22

23

24 **Abstract**

25 SUMOylation is involved in various aspects of plant biology, including drought  
26 stress. However, the relationship between SUMOylation and drought stress tolerance  
27 is complex; whether SUMOylation has a crosstalk with ubiquitination in response to  
28 drought stress remains largely unclear. In this study, we found that both increased and  
29 decreased SUMOylation led to increased survival of apple (*Malus × domestica*) under  
30 drought stress: both transgenic *MdSUMO2A* overexpressing (OE) plants and  
31 *MdSUMO2* RNAi plants exhibited enhanced drought tolerance. We further confirmed  
32 that MdDREB2A is one of the MdSUMO2 targets. Both transgenic *MdDREB2A* OE  
33 and *MdDREB2A*<sup>K192R</sup> OE plants (which lacked the key site of SUMOylation by  
34 MdSUMO2A) were more drought tolerant than wild-type plants. However,  
35 *MdDREB2A*<sup>K192R</sup> OE plants had a much higher survival rate than *MdDREB2A* OE  
36 plants. We further showed SUMOylated MdDREB2A was conjugated with ubiquitin  
37 by MdRNF4 under drought stress, thereby triggering its protein degradation. In  
38 addition, *MdRNF4* RNAi plants were more tolerant to drought stress. These results  
39 revealed the molecular mechanisms that underlie the relationship of SUMOylation  
40 with drought tolerance and provided evidence for the tight control of MdDREB2A  
41 accumulation under drought stress mediated by SUMOylation and ubiquitination.

42 **Key words:** Apple, Drought, SUMOylation, Ubiquitination, MdSUMO2,  
43 MdDREB2A, MdRNF4

44

## 45 **Introduction**

46 Drought stress is one of the main abiotic constraints that limit agricultural  
47 development and productivity (Li et al., 2019; Geng et al., 2020). As the global  
48 climate warms in the twenty-first century, the frequency of severe drought conditions  
49 is increasing (Dai, 2013). Water shortage impairs plant growth and development,  
50 limiting plant production and reducing the performance of crop plants and fruit trees  
51 (Basu et al., 2016). In fruit trees, water deficit inhibits flower bud differentiation and  
52 tree vegetative growth, thereby causing flowers and fruits to drop (Virlet et al., 2015;  
53 Niu et al., 2019). To cope with drought stress, plants respond at both the  
54 morphological and molecular levels, exhibiting changes in photosynthesis, stomatal  
55 movement, hormone content, leaf development, stem extension, root proliferation,  
56 hydraulic conductivity, and gene expression (Yordanov et al., 2000; Seiler et al., 2011;  
57 Basu et al., 2016; Liao et al., 2016; Sun et al., 2018; Geng et al., 2020; Li et al., 2020).  
58 Therefore, decoding the molecular mechanisms that underlie drought responses is  
59 critical to the development of new cultivars for future agriculture (Sun et al., 2013b;  
60 Liao et al., 2016; Geng et al., 2018; Sun et al., 2018; Li et al., 2020).

61 Small Ubiquitin-like Modifier (SUMO) is a ~100-amino-acid polypeptide that is  
62 structurally related to ubiquitin (Vierstra and R., 2012). Similar to ubiquitin, SUMOs  
63 are encoded as precursor proteins. To attain their mature form, precursor SUMOs  
64 require SUMO protease to cleave a C-terminal peptide and expose two consecutive  
65 glycine residues that are essential for conjugation to substrates. The biochemical  
66 pathway of SUMOylation is also analogous to that of ubiquitination. The first step is  
67 SUMO activation, an ATP-dependent reaction that is catalyzed by the heterodimeric  
68 E1-activating enzyme, SAE1/SAE2. In the second step, activated SUMO is  
69 transferred from SAE to the SUMO-conjugating enzyme (SCE). Finally, the  
70 conjugation of SUMO to its substrates is catalyzed by SCE (Colby et al., 2006). The  
71 consensus sequence  $\psi$ KXE/D (where  $\psi$  is a hydrophobic aliphatic residue; X can be  
72 any residue; K, E, and D are standard one-letter symbols for amino acids; and K is the  
73 attachment site for SUMO) is considered to be the canonical SUMO attachment site

74 (Novatchkova et al., 2004; Nabil et al., 2014), although other sites may exist. SUMO  
75 proteases de-SUMOylate the SUMOylated substrates to recycle SUMO. In addition to  
76 its covalent attachment to target proteins, SUMO can also attach to cellular proteins  
77 through noncovalent interactions (Galanty et al., 2012).

78 In addition to the regulation of development and cellular homeostasis under  
79 normal growth conditions, SUMOylation is also involved in various biotic and abiotic  
80 stress responses, including the response to drought stress (Castro et al., 2012).  
81 OsbZIP23 is a SUMOylation substrate that is targeted by the SUMO protease OTS1.  
82 SUMOylation of OsbZIP23 causes the transcriptional activation of drought protection  
83 genes and improves drought tolerance (Srivastava et al., 2017). Overexpression of  
84 SUMO E2-conjugating enzyme (CE) in rice (*Oryza sativa*) impairs drought tolerance  
85 by reducing the accumulated proline content relative to the wild type (Nurdiani et al.,  
86 2018). However, overexpression of SaSce9 from the halophyte grass *Spartina*  
87 *alterniflora* enhances salinity and drought stress tolerance in Arabidopsis (Karan and  
88 Subudhi, 2012), indicating that CE plays various roles in different plants. The SUMO  
89 E3 ligase MMS21 negatively influences Arabidopsis drought response through an  
90 ABA-dependent pathway (Zhang et al., 2013). Likewise, the rice SUMO protease  
91 OsOTS1 also plays a negative role in drought stress response through an  
92 ABA-dependent pathway (Srivastava et al., 2017). Another SUMO E3 ligase, SIZ1,  
93 plays more complicated roles in drought stress response in different plant species.  
94 Rice OsSIZ1 confers drought tolerance in transgenic bentgrass and cotton (Neelam et  
95 al., 2017). Transgenic tobacco plants ectopically expressing tomato SIZ1 are more  
96 tolerant to drought stress (Zhang et al., 2017b), as are Arabidopsis plants  
97 overexpressing SIZ1 (Zhang et al., 2013). However, *siz1* mutant plants displayed  
98 drought-sensitive or drought-tolerant phenotypes in three independent studies (Catala  
99 et al., 2007; Miura et al., 2013; Kim et al., 2017). Reports on Arabidopsis SIZ1  
100 overexpressing (OE) plants and *siz1* mutants indicate that either increased or  
101 decreased SUMOylation levels can improve drought resistance. However, the  
102 physiological and molecular basis for this effect is unclear. In addition, despite the

103 identification of drought-related SUMO targets, the biological function of their  
104 SUMOylation modification is largely unknown.

105 The SUMO-interacting proteins (SIPs) play a crucial role in the regulation of  
106 SUMOylated proteins; they usually interact with SUMO through SUMO-interacting  
107 motifs (SIMs). Proteins with SIMs include a group of RING-type ubiquitin E3  
108 ligases, DNA methyltransferases or demethylases, and histone methyltransferases or  
109 demethylases (Nabil et al., 2014; Kumar et al., 2017). The best-studied SIPs are the  
110 RING-type ubiquitin E3 ligases that target SUMOylated proteins for degradation by  
111 the proteasome pathway. RING finger protein 4 (RNF4, also known as  
112 SUMO-targeted ubiquitin E3 ligase or STUbL) ubiquitinates promyelocytic leukemia  
113 protein (PML) or the nuclear receptor NR4A1 that has been SUMOylated by  
114 SUMO2/3 in mammals (Valérie et al., 2008; Geoffroy and Hay, 2009; Zhang et al.,  
115 2017a). RNF4 also ubiquitinates SUMOylated proteins in the fission yeast  
116 *Schizosaccharomyces pombe* (Sun et al., 2007) and promotes the ubiquitination of  
117 activated MEK1 in a RING-finger-dependent manner in *Dictyostelium* (Sobko et al.).  
118 SUMOylation of PML recruits RNF4, triggering its Lys 48-linked polyubiquitination  
119 and degradation (Tatham et al., 2008; Valérie et al., 2008). NR4A1 is SUMOylated by  
120 SUMO2/3 and targeted by RNF4 for polyubiquitination and subsequent degradation  
121 to control macrophage cell death (Zhang et al., 2017a). Although several studies have  
122 reported the important and conserved role of RNF4 in multicellular eukaryotes, only  
123 one study has investigated the role of AT-STUbL4 in the floral transition in plants  
124 (Nabil et al., 2014) *at-stubl4* mutant plants flowered later than the wild type, whereas  
125 AT-STUbL4 OE plants flowered earlier (Nabil et al., 2014). To date, it remains  
126 unclear whether RNF4 can recognize and ubiquitinate SUMOylated proteins in plants,  
127 especially during the response to drought stress.

128 Dehydration-responsive element-binding factor (DREB2A) is a transcription  
129 factor that binds specifically to the DRE/CRT *cis*-element and is rapidly induced by  
130 dehydration (Liu et al., 1998; Li et al., 2019). DREB2A is a key factor in plant  
131 drought stress tolerance. Overexpression of full-length DREB2A in apple, *Pennisetum*

132 *glaucum*, *Zea mays*, and *O. sativa* enhances tolerance to drought stress (Agarwal et  
133 al., 2007; Qin et al., 2007; Cui et al., 2011; Liao et al., 2016). In *Arabidopsis*,  
134 DREB2A is unstable under control conditions owing to its negative regulatory domain  
135 (NRD) (Sakuma et al., 2006b; Qin et al., 2008; Mizoi et al., 2013; Sadhukhan et al.,  
136 2014; Morimoto et al., 2017). The overexpression of *DREB2A-CA* (a constitutively  
137 active form of DREB2A with the NRD domain deleted) increases drought tolerance in  
138 *Arabidopsis* (Sakuma et al., 2006b). Various posttranslational modifications of  
139 DREB2A, including SUMOylation and ubiquitination, are tightly associated with its  
140 stability and transcriptional activity in *Arabidopsis* (Qin et al., 2008; Wang et al.,  
141 2020). Two types of ubiquitin E3 ligase, BPMs and DRIPs, mediate the degradation  
142 of DREB2A in *Arabidopsis* (Qin et al., 2008; Morimoto et al., 2017). However,  
143 SUMOylation of DREB2A by SCE1 can repress the interaction between DREB2A  
144 and BPM2, thereby increasing DREB2A protein stability under high temperature  
145 (Wang et al., 2020). Whether SUMOylated DREB2A can be targeted by ubiquitin E3  
146 ligases for degradation remains unclear.

147 Apple DREB2A does not contain the NRD domain that is targeted for  
148 degradation in *Arabidopsis*. Unlike *Arabidopsis* DREB2A, MdDREB2A is  
149 consistently stable under normal conditions (Li et al., 2019). Overexpression of  
150 *MsDREB6.2* (a *MdDREB2A* homolog) or *MpDREB2A* enhanced drought tolerance of  
151 apple or *Arabidopsis* (Liao et al., 2016; Li et al., 2019). Given the lack of an NRD  
152 domain in MdDREB2A, its posttranslational modifications and the molecular  
153 mechanisms of its protein stability under stress require clarification. In this study, we  
154 found that both increased and decreased SUMOylation levels improved apple drought  
155 tolerance. We further identified MdDREB2A as one of the SUMOylation target  
156 proteins and demonstrated that SUMOylation of MdDREB2A was critical for protein  
157 stability and drought tolerance. In addition, we further provided evidence that  
158 SUMOylated MdDREB2A could be recognized and ubiquitinated by MDRNF4 under  
159 drought stress, leading to the degradation of MdDREB2A. Our results highlight the  
160 roles of SUMOylation in apple drought tolerance and provide insight into the

161 RNF4-mediated ubiquitination of SUMOylated MdDREB2A in response to drought.

162

## 163 **Results**

### 164 **Expression patterns and localization of SUMO2s in apple**

165 The apple genome contains six SUMO2 genes (Fig. 1A). Due to genome duplication,  
166 each pair of genes on different chromosomes has almost identical coding sequences,  
167 and we therefore named the three pairs MdSUMO2A, MdSUMO2B, and  
168 MdSUMO2C. Protein alignment revealed a protein sequence similarity of 76%–88%  
169 among these three MdSUMO2 proteins (Fig. 1A). To characterize the function of  
170 apple SUMO2 proteins in response to drought stress, we first examined their  
171 expression patterns under drought. We found that the *MdSUMO2s* had similar  
172 expression patterns in response to drought (Fig. 1B), suggesting that they may have  
173 similar functions under drought stress. Apple *SUMO2A* and *SUMO2B* were more  
174 abundant in all tissues, whereas *SUMO2C* was less abundant in all tissues examined  
175 (Fig. S1A). When *MdSUMO2A::GUS* was ectopically expressed in Arabidopsis,  
176 similar results were observed, and GUS signal was detected in all tissues (Fig. S1B–  
177 I).

178 We aligned SUMO2A proteins from different plant species and found that their  
179 sequences were highly conserved throughout the plant kingdom (Fig. S2A).  
180 MdSUMO2A was highly similar to SUMO2A from *Prunus mume* (Fig. S2B). We  
181 then cloned SUMO2A, SUMO2B, and SUMO2C from the apple genome.  
182 Co-localization with mCherry suggested that apple SUMO2A, SUMO2B, and  
183 SUMO2C are localized in the nucleus, plasma membrane, and cytoplasm (Fig. 1C).

### 184 **Knocking down *MdSUMO2s* or knocking in one *MdSUMO2* gene leads to** 185 **drought stress tolerance**

186 To understand the biological function of the MdSUMO2s, we generated a series of  
187 transgenic plants: *MdSUMO2A* OE (over expression) with a higher *MdSUMO2A*

188 expression level; *MdSUMO2A* RNAi with reduced expression of *MdSUMO2A* only;  
189 and *MdSUMO2* RNAi with reduced expression of *MdSUMO2A*, *MdSUMO2B*, and  
190 *MdSUMO2C* (Fig. S3).

191 After transplant, the transgenic plants and non-transgenic plants (GL-3) were  
192 exposed to prolonged drought stress by maintaining soil volumetric water content of  
193 18-23% for three months. As shown in Fig. 2A and B, long-term moderate drought  
194 stress reduced the growth of all plants. However, compared with GL-3 plants,  
195 *MdSUMO2A* OE plants were taller, and *MdSUMO2* RNAi plants were shorter (Fig.  
196 2A-B, Fig. S4). In addition to differences in plant height, *MdSUMO2A* OE plants had  
197 greater stem diameters and longer internodes than GL-3 plants under drought stress,  
198 whereas *MdSUMO2* RNAi plants had smaller stem diameters and shorter internodes  
199 (Fig. S5). Moreover, *MdSUMO2A* OE plants had greater shoot dry weights under  
200 control and drought conditions, whereas *MdSUMO2* RNAi plants had lower  
201 aboveground biomass (Fig. S6). These results indicate that *MdSUMO2A* OE plants  
202 grew more vigorously under long-term drought, whereas *MdSUMO2* RNAi plants  
203 grew more slowly.

204 Drought can adversely affect crop photosynthetic capacity, water use efficiency,  
205 and yield (Xu et al., 2008; Sun et al., 2013a; Mao et al., 2015), and drought stress  
206 reduced the photosynthetic capacity of all plants in the current experiment (Fig. S7).  
207 However, *MdSUMO2A* OE plants had a greater photosynthetic capacity than GL-3  
208 plants under drought stress, whereas that of *MdSUMO2A* RNAi plants was lower (Fig.  
209 S7A). Under drought stress, stomatal conductance and transpiration rate were also  
210 higher in *MdSUMO2A* OE plants than in GL-3 plants, and both parameters were  
211 lower in *MdSUMO2* RNAi plants (Fig. S7B-C). We also measured the photosynthetic  
212 capacity of GL-3 and transgenic plants under drought during the daytime from 7:00  
213 AM to 5:00 PM. Similar results were observed. That is, *MdSUMO2A* OE plants  
214 maintained the highest photosynthetic rate under drought stress and exhibited a higher  
215 transpiration rate and stomatal conductance after noon, whereas *MdSUMO2* RNAi  
216 plants had the lowest values for these parameters (Fig. 2C and Fig. S8).



217 The root system plays an important role in plant drought resistance (Liao et al.,  
218 2016; Geng et al., 2018; Hu et al., 2018). After long-term drought, the root systems of  
219 *MdSUMO2A* OE plants were much more extensive (Fig. 2D), as indicated by root dry  
220 weight in Fig. S10. However, the root systems of *MdSUMO2* RNAi plants were much  
221 smaller than those of GL-3 under control and drought conditions (Fig. 2D and Fig.  
222 S9). Consistent with their strong root systems and greater shoot growth, *MdSUMO2A*  
223 OE plants had higher hydraulic conductivity of roots and shoots (Fig. 2E and F),  
224 whereas those of *MdSUMO2* RNAi plants were lower. These results suggest that  
225 *MdSUMO2A* OE plants performed better under drought, exhibiting vigorous shoot  
226 and root growth, as well as higher hydraulic conductivity and photosynthetic capacity.

227 Leaf morphology is important for drought tolerance (Anyia and Herzog, 2004; Sun  
228 et al., 2013a; Wu et al., 2014). *MdSUMO2* RNAi leaves were smaller than those of  
229 GL-3 and *MdSUMO2A* OE plants under control and drought conditions (Fig. 3A), as  
230 indicated by leaf area measurements in Fig. 3B. Leaf lengths and widths were also  
231 smaller in *MdSUMO2* RNAi plants under control and drought conditions (Fig.  
232 S10A-B). Likewise, under both conditions, single-leaf dry weight was much lower in  
233 *MdSUMO2* RNAi plants than in GL-3 and *MdSUMO2A* OE plants (Fig. S10C).  
234 *MdSUMO2* RNAi leaves were much thicker than GL-3 and *MdSUMO2A* OE leaves  
235 under control and drought conditions (Fig. 3C and D). Consistently, *MdSUMO2* RNAi  
236 leaves had a greater water holding capacity (Fig. 3E). By contrast, the leaf area, dry  
237 weight, thickness, and water holding capacity of *MdSUMO2A* OE leaves were  
238 comparable to those of GL-3 leaves under control and drought conditions (Fig. 3A–  
239 E). Water use efficiency was measured using  $^{13}\text{C}$ , and *MdSUMO2* RNAi plants  
240 maintained a higher WUE than GL-3 and *MdSUMO2* OE plants under control and  
241 drought conditions (Fig. 3F). Plants accumulate the phytohormone abscisic acid  
242 (ABA) after drought stimulus (Zhu, 2016). After drought stress, the ABA content of  
243 *MdSUMO2A* OE plants was lower than that of GL-3 plants, whereas that of  
244 *MdSUMO2* RNAi plants was higher (Fig. S11). These results suggest that *MdSUMO2*  
245 RNAi plants resist drought by adjusting their leaf morphology, increasing their WUE,

246 and accumulating more ABA.

247 There were no significant differences in the parameters mentioned above between  
248 *MdSUMO2A* RNAi and GL-3 plants under drought stress (Fig. 1–4, Fig. S4–12),  
249 suggesting that the *MdSUMO2s* have redundant functions in response to drought.

250 To further support the notion that both *MdSUMO2A* OE and *MdSUMO2* RNAi  
251 plants were tolerant to drought stress, we treated all plants with a shorter-term drought  
252 stress. After 3 weeks of drought treatment, 83% of the GL-3 plants had wilted,  
253 whereas 40% of the *MdSUMO2A* OE plants and 58% of the *MdSUMO2* RNAi plants  
254 were still alive (Fig. 4A-D), suggesting that the *MdSUMO2* RNAi plants had a higher  
255 survival capacity than the *MdSUMO2A* OE plants. By contrast, *MdSUMO2A* RNAi  
256 plants did not differ in survival rate from GL-3 plants under drought stress (Fig.  
257 S4E-F). We also performed an extreme drought treatment after the long-term drought  
258 treatment by withholding water for 10 days. Both the *MdSUMO2* RNAi and  
259 *MdSUMO2A* OE plants performed better than the GL-3 plants under drought, and the  
260 *MdSUMO2* RNAi plants were more drought tolerant than the *MdSUMO2A* OE plants  
261 (Fig. S4B). All these data suggest that *MdSUMO2A* OE and *MdSUMO2* RNAi plants  
262 were more drought tolerant than GL-3 plants and that *MdSUMO2* RNAi plants had  
263 higher survival ability than *MdSUMO2A* OE plants.

264 In addition, we examined the SUMOylation of GL-3 and *MdSUMO2* transgenic  
265 plants under control and prolonged drought stress conditions. As shown in Fig. S12,  
266 *MdSUMO2A* OE plants had a slightly higher SUMOylation level than GL-3 plants  
267 under control and drought conditions, whereas the SUMOylation level of *MdSUMO2*  
268 RNAi plants was lower.

## 269 **Identification of *MdSUMO2* targets reveals SUMOylation of *MdDREB2A* by** 270 ***MdSUMO2s***

271 To identify potential targets of *MdSUMO2* proteins, we performed proteomic  
272 analysis according to previous methods (Miller et al., 2010; Miller and Vierstra,  
273 2011). Since *Arabidopsis* SUMO1 has high sequence similarity with *MdSUMO2* (Fig.

274 S3A), we used the anti-SUMO1 antibody to recognize three MdSUMO2s. After mass  
275 spectrometry, we identified 1314 potential targets of MdSUMO2A (Supplemental  
276 Data Set 1), including MdDREB2A, MdALI, MdAQP2, MdHSP20, MdH2B,  
277 MdCAT2, and MdbZIP (Fig. S13). Using a SUMOylation reconstitution assay in  
278 *Escherichia coli* in which MdSUMO2 and the candidate substrates were expressed  
279 (Elrouby and Coupland, 2010), we verified the SUMOylation of MdDREB2A,  
280 MdAQP2, and MdALI by the MdSUMO2s (Fig. 5A-G). Three and one lysine sites  
281 are potential SUMO conjugation sites in MdDREB2A and MdAQP2, respectively. To  
282 determine the actual SUMOylation sites, each candidate lysine (K) was replaced by  
283 arginine (R) singly or in combinations. SUMOylation assays using the *E. coli* system  
284 suggested that K192 and K272 were required for MdSUMO2A-mediated  
285 SUMOylation of MdDREB2A and MdAQP2, respectively (Fig. 5A and E). In  
286 addition, K192 was also required for MdDREB2A SUMOylation by MdSUMO2C,  
287 whereas K192, K217, and K369 were required for MdDREB2A SUMOylation by  
288 MdSUMO2B (Fig. 5B and C). For MdALI, there are five lysine sites and one SIM for  
289 potential SUMO conjugation. Deleting the SIM or mutating each lysine to R could not  
290 abolish the SUMOylation of MdALI by MdSUMO2A (Fig. S14). However, mutation  
291 of all five lysine sites to R or mutation of four lysine sites to R and in combination  
292 with SIM deletion could almost completely abolish the SUMO conjugation by  
293 MdSUMO2A, indicating that these five lysine sites and the SIM were all required for  
294 SUMOylation of MdALI by MdSUMO2A (Fig. 5G).

295 Because it is an important factor in plant drought stress response (Sakuma et al.,  
296 2006b; Chen et al., 2007; Qin et al., 2007; Reis et al., 2014), we next focused on  
297 MdDREB2A. Since MdDREB2A could be SUMOylated in the *E. Coli* system, and  
298 MdDREB2A did not contain the SIM, we tested the interaction of MdDREB2A and  
299 MdCE, the SUMO E2-conjugating enzyme. MST and CO-IP analysis revealed that  
300 MdCE interacts with MdDREB2A *in vitro and vivo* (Fig. S15). SUMOylation can  
301 affect target protein localization, protein-protein interaction, and protein stability. We  
302 co-localized MdSUMO2A with MdDREB2A and found that SUMOylation of

303 MddREB2A did not affect its subcellular localization (Fig. S16). We also examined  
304 the effect of SUMOylation on the stability of MddREB2A. As shown in Fig. 5H,  
305 MddREB2A protein level was significantly increased in the *MdSUMO2* RNAi plants  
306 under drought conditions but also slightly higher in the *MdSUMO2A* OE plants.

307 In addition to the *in vitro* SUMOylation of MddREB2A, we also examined the *in*  
308 *vivo* SUMOylation of MddREB2A by *MdSUMO2* under control and drought  
309 conditions. After immunoprecipitation using anti-MddREB2A antibody,  
310 SUMOylation of MddREB2A was detected in GL-3 plants under drought stress, but  
311 much less SUMOylation was observed in *MdSUMO2* RNAi plants (Fig. 5H).

### 312 **SUMOylation of MddREB2A is critical for drought stress tolerance and is** 313 **coupled with ubiquitination during drought**

314 DREB2A is a positive regulator of plant drought and heat stress tolerance (Kim et al.,  
315 2011; Meng et al., 2011; Li et al., 2019). Arabidopsis wild-type plants overexpressing  
316 *DREB2A*<sup>K163R</sup> (in which K was mutated to R) exhibited decreased thermotolerance  
317 (Wang et al., 2020). We therefore examined whether SUMOylation of MddREB2A  
318 affected apple drought stress resistance. We transformed 35S::*MdDREB2A*  
319 (*MdDREB2A* OE) and 35S::*MdDREB2A*<sup>K192R</sup> (*MdDREB2A*<sup>K192R</sup> OE, in which K192  
320 was mutated to arginine) into wild-type GL-3 apple plants. Both transgenic plants had  
321 better survival ability under drought stress compared with the wild type (Fig. 6A-B).  
322 However, *MdDREB2A*<sup>K192R</sup> OE plants had a higher survival rate than *MdDREB2A* OE  
323 plants (Fig. 6A-B). In addition, after drought stress, *MdDREB2A* OE plants had higher  
324 photosynthetic capacity than *MdDREB2A*<sup>K192R</sup> OE plants (Fig. 6C). These data  
325 suggest that SUMOylation of MddREB2A tightly controls plant drought tolerance.

326 Because SUMOylation can affect protein stability, we then examined MddREB2A  
327 protein levels in both transgenic plants under control and drought conditions. As  
328 shown in Fig. 6D, both transgenic plants had more MddREB2A than GL-3 plants  
329 under control conditions. Under drought conditions, *MdDREB2A* OE plants  
330 accumulated more MddREB2A protein than GL-3 plants, but less than transgenic

331 plants carrying 35S::*MdDREB2A*<sup>K192R</sup> (Fig. 6D). In addition, the transcripts of  
332 *MdDREB2A* were comparable between two transgenic plants (Fig. 6E). We also  
333 transformed 35S::*MdDREB2A* and 35S::*MdDREB2A*<sup>K192R</sup> into apple calli and found  
334 that transgenic calli carrying either constructs were more tolerant to simulated drought  
335 treatment than wild-type calli. Furthermore, calli carrying 35S::*MdDREB2A*<sup>K192R</sup> were  
336 more tolerant to PEG than calli carrying 35S::*MdDREB2A* (Fig. S17). In apple,  
337 *MdDREB2A* targets *MdCKX4a* to modulate drought tolerance (Liao et al., 2016). We  
338 next evaluated the *MdCKX4a* expression in transgenic plants and GL-3. As shown in  
339 Fig. 6F, *MdCKX4a* expression was higher in transgenic apple plants under normal and  
340 drought conditions and much higher in plants expressing 35S::*MdDREB2A*<sup>K192R</sup> than  
341 in plants carrying 35S::*MdDREB2A*. These results indicate that SUMOylation of  
342 *MdDREB2A* is important for its stability and activity.

343 The above phenomena prompted us to investigate whether other protein  
344 modifications were involved. Indeed, we found that *MdDREB2A* accumulation was  
345 similar in both genotypes of transgenic plants under drought stress when they were  
346 treated with MG132, a 26S proteasome inhibitor (Fig. 7A). The 26S proteasome is  
347 essential for the degradation of ubiquitin-modified proteins (Smalle et al., 2004). We  
348 then examined SUMOylation and ubiquitination in transgenic plants. As shown in  
349 Fig. 7B, both transgenic plants had higher levels of SUMOylation and ubiquitination  
350 after drought stress. Compared with that of *MdDREB2A* OE plants, the SUMOylation  
351 level of *MdDREB2A*<sup>K192R</sup> OE plants was much lower. However, their ubiquitination  
352 level was also lower (Fig. 7B), suggesting that SUMOylated *MdDREB2A* may  
353 undergo ubiquitination in response to drought in *MdDREB2A* OE plants.

#### 354 **MdRNF4 mediates ubiquitination of SUMOylated *MdDREB2A***

355 To identify the proteins responsible for the ubiquitination of SUMOylated  
356 *MdDREB2A*, we performed affinity purified mass spectrometry (AP-MASS) analysis  
357 of *MdDREB2A* under control and drought stress conditions. We identified 1414 and  
358 1472 proteins that may associate with *MdDREB2A* *in planta* under control and  
359 drought conditions, respectively (Supplemental Data set 2). One of the potential

360 MdDREB2A interacting proteins under drought stress was MdRNF4, which encodes  
361 an E3 ubiquitin ligase. Homologs of MdRNF4 in mammalian cells and yeast target  
362 SUMOylated proteins for degradation by the proteasome pathway (Sun et al., 2007;  
363 Tatham et al., 2008; Kumar et al., 2017). We verified the *in vivo* association of  
364 MdDREB2A with MdRNF4 using co-immunoprecipitation (Co-IP) analysis (Fig.  
365 S18). MdRNF4 contains two SUMO interacting motifs (SIMs) (Fig. S19A). To  
366 investigate whether SUMO could be bound to the SIMs of MdRNF4, we performed  
367 an Y2H analysis and found that MdRNF4 could interact with MdSUMO2A. When  
368 both SIMs were deleted, no interaction was detected. However, deletions of only one  
369 SIM did not impair the interaction, indicating that both SIMs are required for the  
370 interaction of MdSUMO2A with MdRNF4 (Fig. S19B–C). A microscale  
371 thermophoresis (MST) approach and Co-IP assay further verified the interaction  
372 between MdSUMO2A and MdRNF4 (Fig. S19D-E).

373 RNF4 is a SUMO-targeted ubiquitin E3 ligase that is required for degradation of  
374 SUMOylated substrates in mammals (Valérie et al., 2008; Geoffroy and Hay, 2009;  
375 Zhang et al., 2017a) and the fission yeast *Schizosaccharomyces pombe* (Sun et al.,  
376 2007). We hypothesized that this protein is responsible for the ubiquitination of  
377 SUMOylated MdDREB2A. To test our hypothesis, we extracted total proteins from  
378 GL-3 and *MdDREB2A* OE plants under drought stress and then added purified  
379 MdRNF4 to the protein extracts for specific durations. The addition of MdRNF4 for 2  
380 h increased the ubiquitination level of MdDREB2A. However, greater MdDREB2A  
381 ubiquitination was observed in *MdDREB2A* OE plants that had higher MdDREB2A  
382 SUMOylation levels (Fig. 8A). When MG132 was applied, the ubiquitination of  
383 MdDREB2A decreased. To further confirm the requirement of MdRNF4 for  
384 degradation of SUMOylated MdDREB2A, we generated transgenic plants with a  
385 reduced level of *MdRNF4* (Fig. S20). After immunoprecipitation with  
386 anti-MdDREB2A antibody, MdDREB2A ubiquitination decreased in *MdRNF4* RNAi  
387 plants under drought conditions (Fig. 8B), further suggesting that MdRNF4 mediates  
388 the ubiquitination of MdDREB2A.

389 To further analyze the modulation of MdDREB2A stability by MdRNF4, we  
390 performed immunoblot analysis of plants under control and drought conditions.  
391 MdDREB2A protein levels were higher in *MdRNF4* RNAi plants than in GL-3 plants,  
392 either under control or drought conditions; although drought stress induced  
393 MdDREB2A accumulation (Fig. 8C). In addition, the *MdRNF4* RNAi plants were  
394 more tolerant to drought stress, consistent with the increased tolerance of *MdRNF4*  
395 RNAi calli to simulated drought (Fig. 8D-F; Fig. S21A-C).

396 Because SUMO2s affect MdDREB2A SUMOylation and stability (Fig. 5G), we  
397 asked whether this effect was related to MdRNF4. We examined the ubiquitination of  
398 MdDREB2A in *MdSUMO2* transgenic plants under control and drought conditions.  
399 After drought stress, *MdSUMO2A* OE plants had higher levels of MdDREB2A  
400 ubiquitination, and *MdSUMO2* RNAi plants had lower levels (Fig. 8G). In addition,  
401 less MdRNF4 accumulated in *MdSUMO2* RNAi plants under drought stress, while  
402 more in *MdSUMO2A* OE plants (Fig. 8H), implying the involvement of ubiquitination  
403 mediated by MdRNF4 in the MdDREB2A SUMOylation and stability.

404

## 405 Discussion

406 Drought stress is one of the major environmental fluctuations that affect plant  
407 productivity and survival (Geng et al., 2018; Li et al., 2019). During evolution, plants  
408 have acquired divergent strategies to respond to water deficiency, including  
409 shortening their life cycles to complete vegetative growth and reproduction before soil  
410 water is depleted, evolving unique morphologies and root systems to avoid drought  
411 stress, and developing the ability to withstand low tissue water content under drought  
412 stress. The latter ability may involve processes such as osmotic adjustment, cellular  
413 elasticity, and epicuticular wax formation (Polania et al., 2016; Wei et al., 2016;  
414 Yıldırım and Kaya, 2017). In our study, both *MdSUMO2A* OE plants and  
415 *MdSUMO2A* RNAi plants were more drought tolerant than the wild type. The  
416 *MdSUMO2A* OE plants exhibited greater root system development, more vigorous

417 growth, and higher photosynthetic capacity and hydraulic conductivity (Fig. 2-3; Fig.  
418 S4–11). The *MdSUMO2A* RNAi transgenic plants had smaller but thicker leaves,  
419 much lower stomatal conductance, and higher water use efficiency (Fig. 2-3; Fig.  
420 S4-11). However, the *MdSUMO2A* RNAi plants had a much higher survival rate than  
421 the *MdSUMO2A* OE plants. These results suggested that both increased and decreased  
422 SUMOylation levels can increase plant drought tolerance.

423 SUMO is a crucial post-translational modifier in plants that is covalently  
424 conjugated with target substrates to maintain chromatin integrity, transduce signals,  
425 stabilize proteins, and change cell locations (Dohmen, 2004; Elrouby, 2015; Rytz et  
426 al., 2016). Previous studies identified a large number of SUMO substrates in  
427 Arabidopsis under heat and oxidative stress, including TPL (TOPLESS), ARF, JAZ,  
428 ABF, and NAC proteins (Miller et al., 2010; Rytz et al., 2016; Rytz et al., 2018). Here,  
429 we identified 1314 potential targets modified by MdSUMO2A in apple (Supplemental  
430 Data set 1). Some MdSUMO2A target proteins were homologous to proteins in  
431 Arabidopsis, whereas the majority was unique proteins in the apple genome. The  
432 reconstituted Arabidopsis SUMOylation cascade in *E. coli* is a rapid and effective  
433 method for evaluating the SUMOylation of potential SUMO target proteins (Okada et  
434 al., 2009; Saitoh et al., 2009). We used the apple SUMOylation cascade in *E. coli* as a  
435 powerful tool to elucidate the SUMOylation level of targets and confirmed that  
436 MdDREB2A, MdALI, and MdAQP2 were MdSUMO2 substrates in apple (Fig. 5),  
437 highlighting the power and reliability of this system.

438 DREB2A encodes a transcription factor that binds to the dehydration-responsive  
439 element (DRE) (Yamaguchishinozaki and Shinozaki, 1994; Liu et al., 1998).  
440 Numerous studies have reported the positive role of DREB2A in response to drought  
441 stress in various plants, including apple, Arabidopsis, rice, maize, and *Pennisetum*  
442 *glaucum*. However, DREB2A sequences from these species did not show high  
443 similarity outside of the conserved DNA binding domain in the N-terminal region that  
444 may function as a nuclear localization signal (Agarwal et al., 2007; Qin et al., 2007;  
445 Qin et al., 2008; Cui et al., 2011; Liao et al., 2016). The N-terminal region of



446 DREB2A that contains the DNA binding and NRD domains is responsible for its  
447 protein stability. The DREB2A NRD domain has been shown to interact with DRIP  
448 and BPM ubiquitin E3 ligases, leading to ubiquitination and degradation of DREB2A  
449 (Qin et al., 2008; Morimoto et al., 2017). DREB2A can be transformed into a stable  
450 and constitutively active form (DREB2A-CA) by deleting its NRD domain, thereby  
451 facilitating plant drought and heat stress tolerance (Sakuma et al., 2006a). In addition,  
452 SUMOylation of DREB2A can increase its protein stability under heat stress by  
453 suppressing its interaction with BPM2 (Wang et al., 2020). However, apple  
454 MdDREB2A does not contain the NRD domain (Fig. S22). Whether apple  
455 MdDREB2A undergoes any protein modifications was previously unknown. In this  
456 study, we found that MdDREB2A was a SUMOylation target of the MdSUMO2s  
457 (Fig. 5A–C). The critical SUMOylation site of MdDREB2A by MdSUMO2A was the  
458 K192 (Fig. 5A). Similar to DREB2As in other plant species, MddREB2A was a  
459 positive regulator of apple drought stress resistance (Fig. 6A–C). SUMOylation of  
460 targets often increases their stability, as well as overall environmental stress resistance  
461 (Miura et al., 2007; Zhou et al., 2017; Wang et al., 2020). To our surprise, we found  
462 that the mutation of K192 to R caused MdDREB2A protein levels to be more stable in  
463 *MdDREB2A<sup>K192R</sup>* OE plants (Fig. 6D). In addition, transgenic plants carrying  
464 *MdDREB2A<sup>K192R</sup>* had a higher survival rate than *MdDREB2A* OE plants, implying that  
465 DREB2A SUMOylation may serve different functions and proceed by different  
466 mechanisms in different plant species in response to stress.

467 In addition to its covalent attachment to target substrates, SUMO can also interact  
468 noncovalently with proteins that contain SIMs (Sun et al., 2007; Nabil et al., 2014;  
469 Kumar et al., 2017). SIPs in mammals and Arabidopsis include ubiquitin E3 ligases,  
470 DNA methyltransferases or demethylases, and histone methyltransferases or  
471 demethylases (Nabil et al., 2014; Kumar et al., 2017). We also identified SIPs in the  
472 apple genome and obtained similar results (Supplemental Data set 3). Among the  
473 SIPs, we identified a RING finger protein 4, MdRNF4, that appeared with the highest  
474 frequency in the Y2H screen. Similar RING-type ubiquitin E3 ligases (RNF4s) have

475 been reported to interact with SUMO and ubiquitinate SUMOylated substrates via the  
476 26S proteasome in mammals and yeast (Sun et al., 2007; Valérie et al., 2008;  
477 Geoffroy and Hay, 2009; Zhang et al., 2017a). Our study found that MdRNF4  
478 mediated ubiquitination of SUMOylated MdDREB2A by a 26S proteasome pathway,  
479 resulting in the degradation of SUMOylated MdDREB2A (Fig. 8). These results  
480 suggest a widely conserved function for RNF4 in ubiquitination among eukaryotes.

481 In summary, we investigated the relationship between SUMOylation and drought  
482 stress tolerance in perennial apple trees. Using *MdSUMO2A* OE and *MdSUMO2*  
483 RNAi plants, we observed that both decreased and increased SUMOylation can  
484 increase plant drought tolerance, although decreased SUMOylation was associated  
485 with relatively higher survival rates. We also showed that increased SUMOylation of  
486 MdDREB2A in *MdSUMO2A* OE and *MdDREB2A* OE plants was associated with  
487 MdRNF4-mediated greater ubiquitination under drought stress, thereby relatively  
488 decreasing MdDREB2A accumulation in *MdSUMO2A* OE and *MdDREB2A* OE  
489 plants compared with *MdSUMO2* RNAi and *MdDREB2A*<sup>K192R</sup> OE plants.

490

## 491 **Methods**

### 492 **Plant materials and growth conditions**

493 The experiments were conducted at Northwest A&F University, Yangling, China  
494 (34°20'N, 108°24'E). The transgenic lines and GL-3 plants after rooting on MS were  
495 transplanted to soil and grown for 3 months at 25°C under a long day photoperiod (14  
496 h : 10 h, light : dark). The general management was conducted using the method  
497 described by Xie (Xie et al., 2017).

498 The leaves of apple 'Golden delicious' (*Malus x domestica*) were used for gene  
499 cloning. A line isolated from 'Royal Gala' (*Malus x domestica*) named GL-3 (Dai et  
500 al., 2013), which has high regeneration capacity, was used for genetic transformation.  
501 GL-3 tissue-cultured plants were subcultured every 4 weeks. They were grown on MS

502 medium (4.43 g/L MS salts, 30 g/L sucrose, 0.2 mg/L 6-BA, 0.2 mg/L IAA, and 7.5  
503 g/L agar, pH 5.8) under long-day conditions (14 h : 10 h, light : dark) at 25°C.

#### 504 **Generation of transgenic apple plants and calli**

505 201-bp (3' UTR region), 121-bp (conserved CDS of *MdSUMO2s*), or 74-bp  
506 fragments of *MdSUMO2A*, *MdSUMO2*, or *MdRNF4* were individually cloned into the  
507 pDONR222 vector by multisite Gateway recombination, as described by Karimi et al.  
508 (Karimi and Hilson, 2007) and subsequently transferred to RNA silencing vector  
509 pK7GWIWG2, a destination vector containing an N-terminal GFP tag by LR  
510 recombination. To overexpress genes, the coding sequences of *MdSUMO2A*,  
511 *MdDREB2A*, or *MdDREB2A*<sup>K192R</sup> were constructed to pCambia 2300 with N-myc tag  
512 or pGWB418. All the constructed vectors were transformed into *Agrobacterium* strain  
513 *EHA105*. *Agrobacterium*-mediated transformation of apple was carried out as  
514 described, using GL-3 as the genetic background (Holefors et al., 1998; Dai et al.,  
515 2013).

516 To generate transgenic apple calli, 'Orin' (*Malus* × *domestica*) calli grown on MS  
517 media (1.5 mg/L 2,4-Dichlorophenoxyacetic acid (2,4-D), and 0.4 mg/L 6-BA at the  
518 dark environment) were used as the wild type. The coding sequence of *MdDREB2A*,  
519 *MdDREB2A*<sup>K192R</sup>, or *MdRNF4* was cloned into plant binary vector pGWB418. A  
520 300-bp sequence of *MdRNF4* was cloned into pK7GWIWG2 to knock down  
521 *MdRNF4* expression. The resulting plasmids were transformed into *Agrobacterium*  
522 strain *EHA105* and then transformed to 'Orin' calli according to previous methods (An  
523 et al., 2019; An et al., 2020) The primers used for constructing these vectors are  
524 shown in Supplemental Data Set 4.

#### 525 **Stress treatment**

526 For long-term drought treatment, 3-month-old GL-3 and transgenic apple  
527 plants were transplanted to a greenhouse at the beginning of April, 2019. The drought  
528 treatment was performed two months later in June. The plants were grown in plastic  
529 pots (15 cm × 20 cm, ~1.3 L) filled with a mixture of sand and substrate

530 (PINDSTRUP, Denmark) (1:1, v/v). The measurement of soil volumetric water  
531 content (VWC) was conducted by TDR (FS6430 , USA). At the beginning of drought  
532 treatment, uniform trees of each line (30 trees for each line) were divided into two  
533 groups for the following treatments (15 trees for each treatment for each line): (1)  
534 control, well-watered, irrigated daily to maintain 43-48% of VWC and (2) moderate  
535 drought, irrigated daily to maintain 18-23% of VWC. The treatment was lasted for  
536 three months. The photosynthetic capacity was determined with LI-Cor 6400 portable  
537 photosynthesis system (LI-COR, Huntington Beach, CA, USA). Hydraulic  
538 conductivity of roots and shoots were conducted by an HPFM (Dynamax, Houston) as  
539 described previously (Geng et al., 2018). The thickness of leaves were measured by  
540 using tungsten filament scanning electron microscope (JSM-6360LV, Japan)  
541 according to the methods described by Liao (Liao et al., 2016) with modifications. For  
542 the detection of leaves  $\delta^{13}\text{C}$  ‰, mature leaves were collected. Leaves were  
543 oven-dried at 105°C for 0.5 h, and then 70°C for 3 days to dry completely. Dried  
544 leaves were ground and filtered through a sieve (80 holes per  $\text{cm}^2$ ). The  $\delta^{13}\text{C}$  ‰ of  
545 leaves was determined with an elementary analysis-isotope ratio mass spectrometer  
546 (Flash EA 1112 HT-Delta V Advantages, Thermo Fisher Scientific) as described  
547 previously (Wang et al., 2018).

548 For short-term drought treatment, 3-month-old uniform trees of GL-3 and  
549 transgenic apples were used. Before treatment, plants were irrigated to maintain  
550 saturation of soil water content. Then plants were withheld with water until VWC  
551 reached 0, and survival rate was calculated after rewatering for one week. The soil  
552 VWC was measured by TDR (FS6430, USA).

### 553 **RNA extraction and quantitative real-time RT-PCR**

554 Total RNA from apple leaves was extracted by a CTAB method. DNase I (Fermentas)  
555 was used to remove residual genomic DNA. We used total RNA to generate cDNA  
556 according to the manufacturer's instructions by using the RevertAid<sup>TM</sup> First Strand  
557 cDNA synthesis kit (Thermo Scientific, USA). The qRT-PCR was performed in a

558 reaction containing GoTaq<sup>®</sup> qPCR Master Mix (Promega, USA), cDNA, and primers  
559 (described in Supplemental Data Set 4) on an CFX96 real-time PCR detection  
560 systems (Bio-Rad, USA). *MdMDH* (malate dehydrogenases) was used as the  
561 reference gene.

## 562 **Subcellular localization**

563 To generate the constructs for subcellular localization assay, coding region of  
564 *MdSUMO2A*, *MdSUMO2B*, or *MdSUMO2C* was amplified and cloned into  
565 pEarleyGate104 vector by BP and LR reactions (Invitrogen), and were then  
566 transformed into *Agrobacterium* strain *C58C1*. The empty vector pGWB455 which  
567 carries 35S::mCherry was also transformed into *Agrobacterium* strain *C58C1*. The  
568 *C58C1* carrying the resulting plasmid, 35S::mCherry, and 35S:p19 (p19 is an RNA  
569 silencing repressor protein from *Tomato bushy stunt virus*) was coinfiltrated into  
570 tobacco leaves (*Nicotiana benthamiana*). Three days later, the leaf epidermal cells  
571 were observed by Nikon A1R/A1 confocal microscope system (Nikon, Tokyo, Japan)  
572 for yellow fluorescence observation.

573 For colocalization of *MdSUMO2A* with *MdDREB2A* or *MdDREB2A*<sup>K192R</sup>, the  
574 full length sequence of *MdDREB2A* or *MdDREB2A*<sup>K192R</sup> was cloned into pGWB455  
575 and then transformed into *C58C1*. Mature fragments of *MdSUMO2A*, *MdSUMO2B*  
576 and *MdSUMO2C* (*MdSUMO2s* with exposed GG) were amplified and individually  
577 cloned into pEarleyGate104 vector by BP and LR reactions (Invitrogen), and were  
578 then transformed into *Agrobacterium* strain *C58C1*. The *C58C1* carrying  
579 mCherry-*MdDREB2A*, 35S:p19, and YFP-*MdSUMO2A*, YFP-*MdSUMO2B*, or  
580 YFP-*MdSUMO2C* were resuspended in the buffer containing 10 mM MgCl<sub>2</sub>, 10 mM  
581 MES-KOH, 180 μM acetosyringone and then co-infiltrated into the tobacco leaves  
582 for 3 d to detect signals with confocal microscope. The primers used are listed in  
583 Supplemental Data Set 4.

## 584 **Histochemical and fluorometric assays for GUS activity**

585 For the promoter-GUS reporter assay, an ~1000 bp DNA fragment upstream of the  
586 *MdSUMO2A* was cloned into pMDC164, and then transformed into *Agrobacterium*  
587 strain *GV3101*. The resulting plasmid was introduced into Col-0 using the  
588 floral-dipping method (Clough and Bent, 1998) for stable transformation in  
589 *Arabidopsis*. GUS activity was observed after staining with 0.5 mg/mL  
590 5-bromo-4-chloro-3-indolyl-b-D-glucuronide as described previously (Guan et al.,  
591 2013). The primers used are listed in Supplemental Data Set 4.

### 592 **Endogenous ABA determination**

593 After three months of moderate drought treatment, the mature leaves were collected  
594 from GL-3 and *MdSUMO2* transgenic lines to determine ABA content. Leaves were  
595 weighed and immediately frozen in liquid nitrogen. Frozen leaves were then  
596 pulverized and ABA was extracted as described previously (Chen et al., 2012; Xie et  
597 al., 2020). Quantitative determination of endogenous ABA was performed on a  
598 UPLC–MS/MS system (QTRAP™ 5500 LC/MS/MS, USA) and a Shimadzu  
599 LC-30AD UPLC system (Tokyo, Japan).

### 600 **SUMOylation assay in *E. coli***

601 SUMOylation assays in *E. coli* were conducted as described previously (Elrouby and  
602 Coupland, 2010). The coding region of *MdAE1* or *MdAE2* were amplified and cloned  
603 into binary expression vector pCDFDuet-1, and mature *MdSUMO2s* or *MdCE* was  
604 cloned into pACYCDuet-1. Prokaryotic expression vector PGEX-4T-1 was used to  
605 express GST-MdDREB2A, MdALI, and MdaQP2 protein. Subsequently, the  
606 resulting plasmids in certain combination were introduced into *Escherichia coli* strain  
607 BL21 (DE3). After incubation at 37°C until OD<sub>600</sub> reached 0.6, 1 mM IPTG  
608 (Isopropyl β-D-1-thiogalactopyranoside) was added to induce protein expression.  
609 Eight hours later, the bacterium was harvested and denatured for western blot  
610 analysis with GST antibody (M20007, Abmart). The primers used are listed in  
611 Supplemental Data Set 4.

### 612 **Immunoblot analysis**

613 The proteins of transgenic apple plants and GL-3 were extracted with protein  
614 extraction buffer [50 mM Tris-HCl, pH 8.0, 150 mM NaCl, 2 mM EDTA, 1 mM DTT,  
615 10% glycerol, 1% Triton X-100, 1 mM phenylmethylsulfonyl fluoride (PMSF), and 1  
616 × Halt protease inhibitor cocktail (Fisher Scientific)] and centrifuged at 14,000 g at  
617 4°C for 10 min. The extracted proteins were used for western blot analysis with  
618 polyclonal MdDREB2A antibody against rabbit, or anti-SUMO (ab5316, Abcam),  
619 anti-Ubiquitin (P4D1, Cell Signaling Technology<sup>®</sup>), anti-MdRNF4 (rabbit  
620 polyclonal antibody, ABclonal Technology), or anti-Actin (AC009, ABclonal  
621 Technology).

### 622 ***In vivo* SUMOylation and ubiquitination analysis**

623 Total proteins extracted from transgenic plants (*MdSUMO2A* OE, *MdSUMO2* RNAi,  
624 *MdDREB2A* OE, *MdDREB2A*<sup>K192R</sup> OE, *MdRNF4* RNAi, and GL-3) were  
625 immunoprecipitated with anti-MdDREB2A and immunoblotted with anti-SUMO  
626 (ab5316, Abcam), or anti-Ubiquitin (P4D1, Cell Signaling Technology<sup>®</sup>) antibodies.  
627 To examine the ubiquitination and SUMOylation of MdDREB2A under drought stress  
628 conditions, plants were dehydrated for 2 hours.

629 To detect the effects of recombinant MdRNF4 on ubiquitination and  
630 SUMOylation of MdDREB2A under simulated drought stress, proteins were extracted  
631 from PEG-treated GL-3 and *MdDREB2A* OE plants, and recombinant MdRNF4 or 50  
632 μM MG132 was added for 2 hours (An et al., 2019; An et al., 2020). Total proteins  
633 were extracted and immunoprecipitated with anti-MdDREB2A and immunoblotted  
634 with anti-SUMO (ab5316, Abcam), or anti-Ubiquitin (P4D1, Cell Signaling  
635 Technology<sup>®</sup>) antibodies.

### 636 **Yeast two-hybrid assay**

637 To identify MdSUMO2 interacting proteins, 1-95 aa of MdSUMO2A (mature  
638 MdSUMO2A with exposed GG) was amplified and cloned into pGBKT7 vector to  
639 generate bait plasmid. Y2H screen was performed to screen the apple library

640 according to the user manual of Matchmaker™ Gold Yeast Two Hybrid System  
641 (Clontech, Japan) by using *Saccharomyces cerevisiae* strain Y2H Gold.

642 To perform the point-to-point Y2H, full length MdSUMO2A was cloned into  
643 pGBKT7, resulting in MdSUMO2A-pGBKT7. Full-length or truncated MdRNF4  
644 with SIM deltion was constructed to pGADT7 vector. MdSUMO2A-pGBKT7 and  
645 MdRNF4-pGADT7 or truncated MdRNF4-pGADT7 were co-transformed into yeast  
646 strain Y2H Gold. The positive clones were selected on SD-Leu-Trp, and then on  
647 SD-Leu-Trp-His-Ade + x- $\alpha$ -gal plates for growth observation and the x- $\alpha$ -gal assay.  
648 The primers used are listed in Supplemental Data Set 4.

#### 649 **CO-IP assay**

650 For Co-IP analysis, the leaves of GL-3 were dehydrated for 2 hours. Total proteins  
651 were extracted from leaf samples with extraction buffer [50 mM Tris-HCl, pH 8.0,  
652 150 mM NaCl, 2 mM EDTA, 1 mM DTT, 10% glycerol, 1% Triton X-100, 1 mM  
653 phenylmethylsulfonyl fluoride (PMSF), and 1 $\times$  Halt protease inhibitor cocktail  
654 (Fisher Scientific)]. The protein extracts were incubated overnight with polyclonal  
655 MdDREB2A antibody. The immunocomplexes were collected by adding protein A/G  
656 agarose beads (Thermo Fisher) and were washed with immunoprecipitation buffer [50  
657 mM Tris-HCl, pH 8.0, 150 mM NaCl, 2 mM EDTA, 1 mM DTT, 10% glycerol,  
658 0.15% Triton X-100, 1 mM PMSF, and 1 $\times$  Halt protease inhibitor cocktail (Fisher  
659 Scientific)]. The pellet (immunocomplexes with beads) was resuspended in 1 $\times$   
660 SDS-PAGE loading buffer. Eluted proteins were analyzed by immunoblotting using  
661 anti-MdRNF4 antibody or anti-MdDREB2A antibody. Chemiluminescence signals  
662 were detected by autoradiography.

#### 663 **AP-MASS assay**

664 To identify the interacting proteins of MdDREB2A *in vivo*, AP-MASS assay was  
665 performed as described previously (Maio et al., 2020) with modifications. Total  
666 proteins were extracted in leaves of GL-3 plants with or without 2 h dehydration



667 treatments using extraction buffer [50 mM Tris-HCl, pH 8.0, 150 mM NaCl, 2 mM  
668 EDTA, 1 mM DTT, 10% glycerol, 1% Triton X-100, 1 mM phenylmethylsulfonyl  
669 fluoride (PMSF), and 1× Halt protease inhibitor cocktail (Fisher Scientific)]. The  
670 protein extracts were incubated overnight with polyclonal MddREB2A antibody and  
671 then added protein A/G agarose beads (Thermo Fisher) to incubate at 4 °C for  
672 additional 4-5 hours. After incubation, the beads were captured with a magnetic rack  
673 and washed three times in 0.5 ml of washing buffer (10 mM Tris-HCl pH 7.5, 150  
674 mM NaCl, 0.5 mM EDTA, 1 mM PMSF protease inhibitor). The pellet  
675 (immunocomplexes with beads) was resuspended in 1× SDS-PAGE loading buffer  
676 and subjected to mass spectrometry analysis (Applied protein technology, China).

#### 677 **Microscale thermophoresis (MST) assay**

678 Full length of MdSUMO2A and MddREB2A were cloned into pET-32a. MdCE or  
679 MdRNF4 was cloned into pGEX-4T and pMAL-c5X, respectively. The resulting  
680 plasmids were expressed in *E. coli* BL21. Recombinant protein MdSUMO2A-HIS  
681 and MddREB2A were purified by HIS Sepharose beads (GE Healthcare, Fairfield,  
682 CT, USA), GST-MdCE was purified by Pierce™ Glutathione Spin Columns (16105,  
683 Thermo Scientific™, USA) and MBP-MdRNF4 was purified by MBP TRAP HP (GE  
684 Healthcare). MST was conducted according the manufacturer's manual (NanoTemper,  
685 Germany). The primers used are listed in Supplemental Data Set 4.

#### 686 **Accession numbers**

687 The accession numbers in GDR are as follows: MdSUMO2B (MD17G1103900,  
688 MD09G1113800), MdSUMO2A (MD03G1194700, MD11G1211000), MdSUMO2C  
689 (MD05G1173700, MD10G1161600); and in NCBI under the following: MddREB2A  
690 (NP\_001280947.1), MdAE1 (XP\_028948277.1), MdAE2 (XP\_008382303.1), MdCE  
691 (XP\_008338336.1), MdRNF4 (XP\_008346210.1), MdALI (XP\_008341016.1),  
692 MdAQP2 (XP\_008363507.1).

#### 693 **Acknowledgements**

694 This work was supported by the National Key Research and Development Program of  
695 China (2019YFD1000100, 2018 YFD1000100) , and National Natural Science  
696 Foundation of China (31872080).

#### 697 **Author contributions**

698 We thank Dr. Zhihong Zhang from Shenyang Agricultural University for providing  
699 tissue-cultured GL-3 plants. Q.G. and F.M. designed the project. X.L., S.Z., L.L.,  
700 H.D., Z.L., P. C., Z.M., S.Z., and B.C. performed the experiments. Q.G., X.L., H.D.,  
701 B.C. and L.L. analyzed the data. Q.G., X.L. and F.M. wrote the manuscript.

#### 702 **Conflict of interests**

703 The authors declare that they have no conflicts of interest.

704

#### 705 **References**

- 706 **Agarwal, P., Agarwal, P.K., Nair, S., Sopory, S.K., and Reddy, M.K.** (2007). Stress-inducible DREB2A  
707 transcription factor from *Pennisetum glaucum* is a phosphoprotein and its phosphorylation  
708 negatively regulates its DNA-binding activity. *Mol Genet Genomics* **277**, 189.
- 709 **An, J.P., Wang, X.F., Zhang, X.W., Bi, S.Q., You, C.X., and Hao, Y.J.** (2019). MdBBX22 regulates  
710 UV-B-induced anthocyanin biosynthesis through regulating the function of MdHY5 and is  
711 targeted by MdBT2 for 26S proteasome-mediated degradation. *Plant Biotechnol J* **17**,  
712 2231-2233.
- 713 **An, J.P., Wang, X.F., Espley, R.V., Lin-Wang, K., Bi, S.Q., You, C.X., and Hao, Y.J.** (2020). An apple B-Box  
714 protein MdBBX37 modulates anthocyanin biosynthesis and hypocotyl elongation  
715 synergistically with MdMYBs and MdHY5. *Plant Cell Physiol.* **61**, 130-143.
- 716 **Anyia, A.O., and Herzog, H.** (2004). Water-use efficiency, leaf area and leaf gas exchange of cowpeas  
717 under mid-season drought. *Europ. J. Agronomy* **20**, 327-339.
- 718 **Basu, S., Ramegowda, V., Kumar, A., and Pereira, A.** (2016). Plant adaptation to drought stress.  
719 *F1000research* **5**, 1554.
- 720 **Castro, P.H., Tavares, R.M., Bejarano, E.R., and Azevedo, H.** (2012). SUMO, a heavyweight player in  
721 plant abiotic stress responses. *Cell Mol Life Sci* **69**, 3269-3283.
- 722 **Catala, R., Ouyang, J., Abreu, I.A., Hu, Y., Seo, H., Zhang, X., and Chua, N.H.** (2007). The Arabidopsis  
723 E3 SUMO ligase SIZ1 regulates plant growth and drought responses. *Plant cell* **19**, 2952-2966.
- 724 **Chen, M., Wang, Q., Cheng, X., Xu, Z., Li, L., Ye, X., Xia, L., and Ma, Y.** (2007). GmDREB2, a soybean  
725 DRE-binding transcription factor, conferred drought and high-salt tolerance in transgenic  
726 plants. *Biochem. Biophys. Res. Commun.* **353**, 299-305.
- 727 **Chen, M.L., Fu, X.M., Liu, J.Q., Ye, T.T., Hou, S.Y., Huang, Y.Q., Yuan, B.F., Wu, Y., and Feng, Y.Q.** (2012).

- 728 Highly sensitive and quantitative profiling of acidic phytohormones using derivatization  
729 approach coupled with nano-LC-ESI-Q-TOF-MS analysis. *J Chromatogr B Analyt Technol*  
730 *Biomed Life Sci* **905**, 67-74.
- 731 **Clough, S., and Bent, A.** (1998). Floral dip: a simplified method for *Agrobacterium*-mediated  
732 transformation of *Arabidopsis thaliana*. *Plant J.* **16**, 735-743.
- 733 **Colby, T., Matthai, A., Boeckelmann, A., and Stuitable, H.P.** (2006). SUMO-conjugating and  
734 SUMO-deconjugating enzymes from *Arabidopsis*. *Plant Physiol* **142**, 318-332.
- 735 **Cui, M., Zhang, W., Zhang, Q., Xu, Z., Zhu, Z., Duan, F., and Wu, R.** (2011). Induced over-expression of  
736 the transcription factor OsDREB2A improves drought tolerance in rice. *Plant physiology and*  
737 *biochemistry : PPB* **49**, 1384-1391.
- 738 **Dai, A.G.** (2013). Increasing drought under global warming in observations and models. *Nature*  
739 *Climate Change* **3**, 52-58.
- 740 **Dai, H., Li, W., Han, G., Yang, Y., Ma, Y., Li, H., and Zhang, Z.** (2013). Development of a seedling clone  
741 with high regeneration capacity and susceptibility to *Agrobacterium* in apple. *Sci. Hortic* **164**,  
742 202-208.
- 743 **Dohmen, R.J.** (2004). SUMO protein modification. *Biochim Biophys Acta* **1695**, 113-131.
- 744 **Elrouby, N.** (2015). Analysis of small ubiquitin-like modifier (SUMO) targets reflects the essential  
745 nature of protein SUMOylation and provides insight to elucidate the role of SUMO in plant  
746 development. *Plant Physiol* **169**, 1006-1017.
- 747 **Elrouby, N., and Coupland, G.** (2010). Proteome-wide screens for small ubiquitin-like modifier (SUMO)  
748 substrates identify *Arabidopsis* proteins implicated in diverse biological processes. *P Natl*  
749 *Acad Sci USA* **107**, 17415-17420.
- 750 **Galanty, Y., Belotserkovskaya, R., Coates, J., and Jackson, S.P.** (2012). RNF4, a SUMO-targeted  
751 ubiquitin E3 ligase, promotes DNA double-strand break repair. *Genes Dev* **26**, 1179-1195.
- 752 **Geng, D.L., Shen, X., Xie, Y., Yang, Y., Bian, R., Gao, Y., Li, P., Sun, L., Feng, H., Ma, F., and Guan, Q.**  
753 (2020). Regulation of phenylpropanoid biosynthesis by MdMYB88 and MdMYB124  
754 contributes to pathogen and drought resistance in apple. *Hortic Res* **7**.
- 755 **Geng, D.L., Chen, P.X., Shen, X.X., Zhang, Y., Li, X.W., Jiang, L.J., Xie, Y.P., Niu, C.D., Zhang, J., Huang,**  
756 **X.H., Ma, F.W., and Guan, Q.M.** (2018). MdMYB88 and MdMYB124 enhance drought  
757 tolerance by modulating root vessels and cell walls in apple. *Plant Physiol* **178**, 1296-1309.
- 758 **Geoffroy, M.-C., and Hay, R.T.** (2009). An additional role for SUMO in ubiquitin-mediated proteolysis.  
759 *Nat Rev Mol Cell Biol* **10**, 564.
- 760 **Guan, Q.M., Lu, X.Y., Zeng, H.T., Zhang, Y.Y., and Zhu, J.H.** (2013). Heat stress induction of miR398  
761 triggers a regulatory loop that is critical for thermotolerance in *Arabidopsis*. *Plant J* **74**,  
762 840-851.
- 763 **Holefors, A., Xue, Z.T., and Welander, M.** (1998). Transformation of the apple rootstock M26 with the  
764 rolA gene and its influence on growth. *J Plant Physiol* **136**, 69-78.
- 765 **Hu, L., Xie, Y., Fan, S., Wang, Z., Wang, F., Zhang, B., Li, H., Song, J., and Kong, L.** (2018). Comparative  
766 analysis of root transcriptome profiles between drought-tolerant and susceptible wheat  
767 genotypes in response to water stress. *Plant Sci* **272**, 276.
- 768 **Karan, R., and Subudhi, P.K.** (2012). A stress inducible SUMO conjugating enzyme gene (SaSce9) from  
769 a grass halophyte *Spartina alterniflora* enhances salinity and drought stress tolerance in  
770 *Arabidopsis*. *BMC Plant Biol* **12**, 187-187.
- 771 **Karimi, M., and Hilson, D.P.** (2007). Recombinational cloning with plant gateway vectors. *Plant Physiol*

- 772           **145**, 1144-1154.
- 773   **Kim, J.-S., Mizoi, J., Yoshida, T., Fujita, Y., Nakajima, J., Ohori, T., Todaka, D., Nakashima, K.,**  
774           **Hirayama, T., Shinozaki, K., and Yamaguchi-Shinozaki, K.** (2011). An ABRE promoter  
775           sequence is involved in osmotic stress-responsive expression of the DREB2A gene, which  
776           encodes a transcription factor regulating drought-inducible genes in Arabidopsis. *Plant Cell*  
777           *Physiol* **52**, 2136-2146.
- 778   **Kim, J., Song, J., and Seo, H.** (2017). Post-translational modifications of Arabidopsis E3 SUMO ligase  
779           AtSIZ1 are controlled by environmental conditions. *FEBS Open Bio* **7**, 1622-1634.
- 780   **Kumar, R., Gonzalez-Prieto, R., Xiao, Z., Verlaan-de Vries, M., and Vertegaal, A.C.O.** (2017). The  
781           STUBL RNF4 regulates protein group SUMOylation by targeting the SUMO conjugation  
782           machinery. *Nat Commun* **8**.
- 783   **Li, X.W., Chen, P.X., Xie, Y.P., Yan, Y., Wang, L.P., Dang, H., Zhang, J., Xu, L.Y., Ma, F.W., and Guan,**  
784           **Q.M.** (2020). Apple SERRATE negatively mediates drought resistance by regulating MdMYB88  
785           and MdMYB124 and microRNA biogenesis. *Hortic Res* **7**.
- 786   **Li, X.W., Xie, Y., Lu, L., Yan, M., Fang, N., Xu, J., Wang, L., Yan, Y., Zhao, T., van Nocker, S., Ma, F.,**  
787           **Liang, D., and Guan, Q.** (2019). Contribution of methylation regulation of MpDREB2A  
788           promoter to drought resistance of *Mauls prunifolia*. *Plant Soil* **441**, 15-32.
- 789   **Liao, X., Guo, X., Wang, Q., Wang, Y., Zhao, D., Yao, L., Wang, S., Liu, G., and Li, T.** (2016).  
790           Overexpression of MsDREB6. 2 results in cytokinin- deficient developmental phenotypes and  
791           enhances drought tolerance in transgenic apple plants. *Plant J* **89**.
- 792   **Liu, Q., Kasuga, M., Sakuma, Y., Abe, H., Miura, S., Yamaguchi-Shinozaki, K., and Shinozaki, K.** (1998).  
793           Two transcription factors, DREB1 and DREB2, with an EREBP/AP2 DNA binding domain  
794           separate two cellular signal transduction pathways in drought-and  
795           low-temperature-responsive gene expression, respectively, in Arabidopsis. *Plant Cell* **10**,  
796           1391-1406.
- 797   **Maio, F., Helderma, T.A., Arroyo-Mateos, M., van der Wolf, M., Boeren, S., Prins, M., and van den**  
798           **Burg, H.A.** (2020). Identification of tomato proteins that interact with replication initiator  
799           protein (Rep) of the geminivirus TYLCV. *Front Plant Sci* **11**, 1069.
- 800   **Mao, H., Wang, H., Liu, S., Li, Z., Yang, X., Yan, J., Li, J., Tran, L.S., and Qin, F.** (2015). A transposable  
801           element in a NAC gene is associated with drought tolerance in maize seedlings. *Nat Commun*  
802           **6**, 8326.
- 803   **Meng, C., Zhang, W., Zhang, Q., Xu, Z., Zhu, Z., Duan, F., and Wu, R.** (2011). Induced over-expression  
804           of the transcription factor OsDREB2A improves drought tolerance in rice. *Plant physiology*  
805           and biochemistry : PPB **49**, 1384-1391.
- 806   **Miller, M.J., and Vierstra, R.D.** (2011). Mass spectrometric identification of SUMO substrates provides  
807           insights into heat stress-induced SUMOylation in plants. *Plant Signal Behav* **6**, 130-133.
- 808   **Miller, M.J., Barrett-Wilt, G.A., Hua, Z., and Vierstra, R.D.** (2010). Proteomic analyses identify a  
809           diverse array of nuclear processes affected by small ubiquitin-like modifier conjugation in  
810           Arabidopsis. *P Natl Acad Sci USA* **107**, 16512-16517.
- 811   **Miura, K., Okamoto, H., Okuma, E., Shiba, H., Kamada, H., Hasegawa, P., and Murata, Y.** (2013). SIZ1  
812           deficiency causes reduced stomatal aperture and enhanced drought tolerance via controlling  
813           salicylic acid-induced accumulation of reactive oxygen species in Arabidopsis. *Plant J* **73**,  
814           91-104.

- 815 **Miura, K., Jin, J.B., Lee, J., Yoo, C.Y., Stirm, V., Miura, T., Ashworth, E.N., Bressan, R.A., Yun, D.J., and**  
816 **Hasegawa, P.M.** (2007). SIZ1-mediated sumoylation of ICE1 controls CBF3/DREB1A  
817 expression and freezing tolerance in Arabidopsis. *Plant Cell* **19**, 1403-1414.
- 818 **Mizoi, J., Ohori, T., Moriwaki, T., Kidokoro, S., Todaka, D., Maruyama, K., Kusakabe, K., Osakabe, Y.,**  
819 **Shinozaki, K., and Yamaguchi-Shinozaki, K.** (2013). GmDREB2A;2, a canonical  
820 DEHYDRATION-RESPONSIVE ELEMENT-BINDING PROTEIN2-type transcription factor in  
821 soybean, is posttranslationally regulated and mediates dehydration-responsive  
822 element-dependent gene expression. *Plant Physiol* **161**, 346-361.
- 823 **Morimoto, K., Ohama, N., Kidokoro, S., Mizoi, J., Takahashi, F., Todaka, D., Mogami, J., Sato, H., Qin,**  
824 **F., Kim, J.-S., Fukao, Y., Fujiwara, M., Shinozaki, K., and Yamaguchi-Shinozaki, K.** (2017).  
825 BPM-CUL3 E3 ligase modulates thermotolerance by facilitating negative regulatory  
826 domain-mediated degradation of DREB2A in Arabidopsis. *P Natl Acad Sci USA* **114**,  
827 E8528-E8536.
- 828 **Nabil, E., Mitzi Villajuana, B., Aimone, P., and George, C.** (2014). Identification of Arabidopsis  
829 SUMO-interacting proteins that regulate chromatin activity and developmental transitions. *P*  
830 *Natl Acad Sci USA* **110**, 19956-19961.
- 831 **Neelam, M., Li, S., Xunlu, Z., Jennifer, S., Anurag, P.S., Xiaojie, Y., Necla, P., Nardana, E., Hong, L., and**  
832 **Guoxin, S.** (2017). Overexpression of the rice SUMO E3 ligase gene OsSIZ1 in cotton enhances  
833 drought and heat tolerance, and substantially improves fiber yields in the field under reduced  
834 irrigation and rainfed conditions. *Plant Cell Physiol.*, 735-746.
- 835 **Niu, C.D., Li, H., Jiang, L., Yan, M., Li, C., Geng, D., Xie, Y., Yan, Y., Shen, X., Chen, P., Dong, J., Ma, F.,**  
836 **and Guan, Q.** (2019). Genome-wide identification of drought-responsive microRNAs in two  
837 sets of Malus from interspecific hybrid progenies. *Hortic Res* **6**, 75.
- 838 **Novatchkova, M., Budhiraja, R., Coupland, G., Eisenhaber, F., and Bachmair, A.** (2004). SUMO  
839 conjugation in plants. *Planta* **220**, 1-8.
- 840 **Nurdiani, D., Widyajayantie, D., and Nugroho, S.** (2018). OsSCE1 encoding SUMO E2-conjugating  
841 enzyme involves in drought stress response of Oryza sativa. *Rice Science* **25**, 73-81.
- 842 **Okada, S., Nagabuchi, M., Takamura, Y., Nakagawa, T., Shinmyozu, K., Nakayama, J.-i., and Tanaka, K.**  
843 (2009). Reconstitution of Arabidopsis thaliana SUMO pathways in E. coli: functional  
844 evaluation of SUMO machinery proteins and mapping of SUMOylation sites by mass  
845 spectrometry. *Plant Cell Physiol* **50**, 1049-1061.
- 846 **Polania, J.A., Poschenrieder, C., Beebe, S., and Rao, I.M.** (2016). Effective use of water and increased  
847 dry matter partitioned to grain contribute to yield of common bean improved for drought  
848 resistance. *Front Plant Sci* **7**.
- 849 **Qin, F., Kakimoto, M., Sakuma, Y., Maruyama, K., Osakabe, Y., Tran, L., Shinozaki, K., and**  
850 **Yamaguchi-Shinozaki, K.** (2007). Regulation and functional analysis of ZmDREB2A in response  
851 to drought and heat stresses in Zea mays L. *Plant J* **50**, 54-69.
- 852 **Qin, F., Sakuma, Y., Tran, L.S., Maruyama, K., Kidokoro, S., Fujita, Y., Fujita, M., Umezawa, T.,**  
853 **Sawano, Y., Miyazono, K., Tanokura, M., Shinozaki, K., and Yamaguchi-Shinozaki, K.** (2008).  
854 Arabidopsis DREB2A-interacting proteins function as RING E3 ligases and negatively regulate  
855 plant drought stress-responsive gene expression. *Plant Cell* **20**, 1693-1707.
- 856 **Reis, R.R., Dias Brito da Cunha, B.A., Martins, P.K., Bazzo Martins, M.T., Alekcevetch, J.C.,**  
857 **Chalfun-Junior, A., Andrade, A.C., Ribeiro, A.P., Qin, F., Mizoi, J., Yamaguchi-Shinozaki, K.,**  
858 **Nakashima, K., Correa Carvalho, J.d.F., Ferreira de Sousa, C.A., Nepomuceno, A.L.,**

- 859 **Kobayashi, A.K., and Correa Molinari, H.B.** (2014). Induced over-expression of ArDREB2A CA  
860 improves drought tolerance in sugarcane. *Plant Sci* **221**, 59-68.
- 861 **Rytz, T., Miller, M., McLoughlin, F., Augustine, R., Marshall, R., Juan, Y., Charnng, Y., Scalf, M., Smith,**  
862 **L., and Vierstra, R.** (2018). SUMOylome profiling reveals a diverse array of nuclear targets  
863 modified by the SUMO ligase SIZ1 during heat stress. *Plant Cell* **30**, 1077-1099.
- 864 **Rytz, T.C., Miller, M.J., and Vierstra, R.D.** (2016). Purification of SUMO Conjugates from Arabidopsis  
865 for Mass Spectrometry Analysis. *Methods Mol Biol*, 257-281.
- 866 **Sadhukhan, A., Panda, S.K., and Sahoo, L.** (2014). The cowpea RING ubiquitin ligase VuDRIP interacts  
867 with transcription factor VuDREB2A for regulating abiotic stress responses. *Plant Physiol*  
868 *Biochem.* **83**, 51-56.
- 869 **Saitoh, H., Uwada, J., and Azusa, K.** (2009). Strategies for the expression of SUMO-modified target  
870 proteins in Escherichia coli. *Methods Mol Biol* **497**, 211-221.
- 871 **Sakuma, Y., Maruyama, K., Qin, F., Osakabe, Y., Shinozaki, K., and Yamaguchi-Shinozaki, K.** (2006a).  
872 Dual function of an Arabidopsis transcription factor DREB2A in water-stress-responsive and  
873 heat-stress-responsive gene expression. *P Natl Acad Sci USA* **103**, 18822-18827.
- 874 **Sakuma, Y., Maruyama, K., Osakabe, Y., Qin, F., Seki, M., Shinozaki, K., and Yamaguchi-Shinozaki, K.**  
875 (2006b). Functional analysis of an Arabidopsis transcription factor, DREB2A, involved in  
876 drought-responsive gene expression. *Plant Cell* **18**, 1292-1309.
- 877 **Seiler, C., Harshavardhan, V.T., Rajesh, K., Reddy, P.S., Strickert, M., Rolletschek, H., Scholz, U.,**  
878 **Wobus, U., and Sreenivasulu, N.** (2011). ABA biosynthesis and degradation contributing to  
879 ABA homeostasis during barley seed development under control and terminal drought-stress  
880 conditions. *J Exp Bot* **62**, 2615-2632.
- 881 **Smalle, Jan, Vierstra, Richard, and D.** (2004). The ubiquitin 26S proteasome proteolytic pathway.  
882 *Annu Rev Plant Biol* **55**, 555-590.
- 883 **Sobko, A., Ma, H., and Firtel, R.A.** Regulated SUMOylation and ubiquitination of DdMEK1 is required  
884 for proper chemotaxis. *Dev Cell* **2**, 0-756.
- 885 **Srivastava, A., Zhang, C., Caine, R., Gray, J., and Sadanandom, A.** (2017). Rice SUMO protease Overly  
886 Tolerant to Salt 1 targets the transcription factor, OsbZIP23 to promote drought tolerance in  
887 rice. *Plant J.*
- 888 **Sun, H., Leveson, J.D., and Hunter, T.** (2007). Conserved function of RNF4 family proteins in  
889 eukaryotes: targeting a ubiquitin ligase to SUMOylated proteins. *EMBO J* **26**, 4102-4112.
- 890 **Sun, J., Gu, J., Zeng, J., Han, S., Song, A., Chen, F., Fang, W., Jiang, J., and Chen, S.** (2013a). Changes in  
891 leaf morphology, antioxidant activity and photosynthesis capacity in two different  
892 drought-tolerant cultivars of chrysanthemum during and after water stress. *Sci. Hortic* **161**,  
893 249-258.
- 894 **Sun, X., Wang, P., Jia, X., Huo, L.Q., Che, R.M., and Ma, F.W.** (2018). Improvement of drought  
895 tolerance by overexpressing MdATG18a is mediated by modified antioxidant system and  
896 activated autophagy in transgenic apple. *Plant Biotechnol J* **16**, 545-557.
- 897 **Sun, X.P., Yan, H.L., Kang, X.Y., and Ma, F.W.** (2013b). Growth, gas exchange, and water-use efficiency  
898 response of two young apple cultivars to drought stress in two scion-one rootstock grafting  
899 system. *Photosynthetica* **51**, 404-410.
- 900 **Tatham, M.H., Marie-Claude, G., Linnan, S., Anna, P., Neil, H., Jaffray, E.G., Palvimo, J.J., and Hay, R.T.**  
901 (2008). RNF4 is a poly-SUMO-specific E3 ubiquitin ligase required for arsenic-induced PML  
902 degradation. *Nat Cell Biol* **10**, 538-546.

- 903 **Valérie, L.B., Marion, J., Shirine, B., Rihab, N., Ming, L., Laurent, P., Jun, Z., Jun, Z., Brian, R., and**  
904 **Hugues, D.T.** (2008). Arsenic degrades PML or PML-RARalpha through a SUMO-triggered  
905 RNF4/ubiquitin-mediated pathway. *Nat Cell Biol* **10**, 547-555.
- 906 **Vierstra, and R., D.** (2012). The Expanding Universe of Ubiquitin and Ubiquitin-Like Modifiers. *Plant*  
907 *Physiol* **160**, 2.
- 908 **Virlet, N., Costes, E., Martinez, S., Kelner, J.J., and Regnard, J.L.** (2015). Multispectral airborne  
909 imagery in the field reveals genetic determinisms of morphological and transpiration traits of  
910 an apple tree hybrid population in response to water deficit. *J Exp Bot* **66**, 5453-5465.
- 911 **Wang, F., Liu, Y., Shi, Y., Han, D., Wu, Y., Ye, W., Yang, H., Li, G., Cui, F., Wan, S., Lai, J., and Yang, C.**  
912 (2020). SUMOylation stabilizes the transcription factor DREB2A to improve plant  
913 thermotolerance. *Plant Physiol* **183**, 41-50.
- 914 **Wang, H., Zhao, S., Mao, K., Dong, Q., Liang, B., Li, C., Wei, Z., Li, M., and Ma, F.** (2018). Mapping  
915 QTLs for water-use efficiency reveals the potential candidate genes involved in regulating the  
916 trait in apple under drought stress. *BMC Plant Biol* **18**, 136.
- 917 **Wei, W., Hu, Y., Han, Y.-T., Zhang, K., Zhao, F.-L., and Feng, J.-Y.** (2016). The WRKY transcription factors  
918 in the diploid woodland strawberry *Fragaria vesca*: Identification and expression analysis  
919 under biotic and abiotic stresses. *Plant Physiol Biochem.* **105**, 129-144.
- 920 **Wu, S., Liang, D., and Ma, F.** (2014). Leaf micromorphology and sugar may contribute to differences in  
921 drought tolerance for two apple cultivars. *Plant Physiol Biochem.* **80**, 249-258.
- 922 **Xie, Y.P., Bao, C.N., Chen, P.X., Cao, F.G., Liu, X.F., Geng, D.L., Li, Z.X., Li, X.W., Hou, N., Zhi, F., Niu,**  
923 **C.D., Zhou, S.X., Zhan, X.Q., Ma, F.W., and Guan, Q.M.** (2020). ABA homeostasis is mediated  
924 by a feedback regulation of MdMYB88 and MdMYB124. *J Exp Bot.* **eraa449**.
- 925 **Xie, Y.P., Chen, P.X., Yan, Y., Bao, C.N., Li, X.W., Wang, L.P., Shen, X.X., Li, H., Liu, X.F., Niu, C.D., Zhu,**  
926 **C., Fang, N., Shao, Y., Zhao, T., Yu, J., Zhu, J., Xu, L., van Nocker, S., Ma, F.W., and Guan, Q.M.**  
927 (2017). An atypical R2R3 MYB transcription factor increases cold hardiness by CBF-dependent  
928 and CBF-independent pathways in apple. *New Phytol* **218**, 201-218.
- 929 **Xu, G., Duan, B., and Li, C.** (2008). Different adaptive responses of leaf physiological and biochemical  
930 aspects to drought in two contrasting populations of seabuckthorn. *Can. J. For. Res.* **38**,  
931 584-591.
- 932 **Yamaguchishinozaki, K., and Shinozaki, K.** (1994). A novel cis-acting element in an Arabidopsis gene is  
933 involved in responsiveness to drought, low-temperature, or high-salt stress. *Plant Cell* **6**,  
934 251-264.
- 935 **Yildirim, K., and Kaya, Z.** (2017). Gene regulation network behind drought escape, avoidance and  
936 tolerance strategies in black poplar (*Populus nigra* L.). *Plant Physiol Biochem* **115**, 183-199.
- 937 **Yordanov, I., Velikova, V., and Tsonev, T.** (2000). Plant responses to drought, acclimation, and stress  
938 tolerance. *Photosynthetica* **38**, 171-186.
- 939 **Zhang, L., Xie, F., Zhang, J., Dijke, P.T., and Zhou, F.** (2017a). SUMO-triggered ubiquitination of NR4A1  
940 controls macrophage cell death. *Cell Death & Differentiation* **24**.
- 941 **Zhang, S., Qi, Y., Liu, M., and Yang, C.** (2013). SUMO E3 ligase AtMMS21 regulates drought tolerance  
942 in *Arabidopsis thaliana*. *J Integr Plant Biol* **55**, 83-95.
- 943 **Zhang, S., Zhuang, K., Wang, S., Lv, J., Ma, N.N., and Meng, Q.** (2017b). A novel tomato SUMO E3  
944 ligase, SISIZ1, confers drought tolerance in transgenic tobacco. *J Integr Plant Biol*.
- 945 **Zhou, L.J., Li, Y.Y., Zhang, R.F., Zhang, C.L., Xie, X.B., Zhao, C., and Hao, Y.J.** (2017). The small  
946 ubiquitin-like modifier E3 ligase MdSIZ1 promotes anthocyanin accumulation by sumoylating

947 MdMYB1 under low-temperature conditions in apple. *Plant Cell Environ* **40**, 2068-2080.

948 **Zhu, J.K.** (2016). Abiotic stress signaling and responses in plants. *Cell* **167**, 313-324.

949



**A**

|          |              |                                                                                                                                                                                                                                                                                                                                                             |     |
|----------|--------------|-------------------------------------------------------------------------------------------------------------------------------------------------------------------------------------------------------------------------------------------------------------------------------------------------------------------------------------------------------------|-----|
| MdSUMO2A | MD03G1194700 | .....MSGVTN <b>Q</b> EDDK <b>P</b> ND <b>Q</b> SAHINLKVKGQD <b>G</b> NEVF <b>R</b> IKRST <b>Q</b> LK <b>K</b> LM <b>N</b> AYCD <b>R</b> Q <b>S</b> VE <b>F</b> NS <b>I</b> AF <b>L</b> FD <b>G</b> RR <b>L</b> RA <b>E</b> Q <b>T</b> PD <b>E</b> LE <b>M</b> ED <b>G</b> DE <b>I</b> D <b>A</b> ML <b>H</b> Q <b>T</b> GG <b>S</b> FA                      | 98  |
|          | MD11G1211000 | .....MSGVTN <b>Q</b> EDDK <b>P</b> ND <b>Q</b> SAHINLKVKGQD <b>G</b> NEVF <b>R</b> IKRST <b>Q</b> LK <b>K</b> LM <b>N</b> AYCD <b>R</b> Q <b>S</b> VE <b>F</b> NS <b>I</b> AF <b>L</b> FD <b>G</b> RR <b>L</b> RA <b>E</b> Q <b>T</b> PD <b>E</b> LE <b>M</b> ED <b>G</b> DE <b>I</b> D <b>A</b> ML <b>H</b> Q <b>T</b> GG <b>S</b> FA                      | 98  |
| MdSUMO2B | MD17G1103900 | .....M <b>S</b> TP <b>Q</b> Q <b>E</b> EDDK <b>P</b> ND <b>Q</b> SAHINLKVKGQD <b>G</b> NEVF <b>R</b> IKRST <b>Q</b> LK <b>K</b> LM <b>N</b> AYCD <b>R</b> Q <b>S</b> VE <b>M</b> NS <b>I</b> AF <b>L</b> FD <b>G</b> RR <b>L</b> RA <b>E</b> Q <b>T</b> PD <b>E</b> LE <b>M</b> ED <b>G</b> DE <b>I</b> D <b>A</b> ML <b>H</b> Q <b>T</b> GG <b>A</b> VQ    | 97  |
|          | MD09G1113800 | .....M <b>S</b> TP <b>Q</b> Q <b>E</b> EDDK <b>P</b> ND <b>Q</b> SAHINLKVKGQD <b>G</b> NEVF <b>R</b> IKRST <b>Q</b> LK <b>K</b> LM <b>N</b> AYCD <b>R</b> Q <b>S</b> VE <b>M</b> NS <b>I</b> AF <b>L</b> FD <b>G</b> RR <b>L</b> RA <b>E</b> Q <b>T</b> PD <b>E</b> LE <b>M</b> ED <b>G</b> DE <b>I</b> D <b>A</b> ML <b>H</b> Q <b>T</b> GG <b>A</b> VQ    | 97  |
| MdSUMO2C | MD05G1173700 | MSATGGGG <b>S</b> GGGG <b>E</b> AK <b>K</b> P <b>L</b> D <b>Q</b> SAHINLKVKGQD <b>G</b> NEVF <b>R</b> IK <b>H</b> TT <b>Q</b> LK <b>K</b> LM <b>T</b> AYCD <b>R</b> Q <b>S</b> VD <b>M</b> NS <b>I</b> AF <b>L</b> FD <b>G</b> RR <b>L</b> RA <b>E</b> Q <b>T</b> PD <b>E</b> LE <b>M</b> ED <b>G</b> DE <b>I</b> D <b>A</b> ML <b>H</b> Q <b>T</b> GG...   | 103 |
|          | MD10G1161600 | MSATDGG <b>R</b> ...GGG <b>R</b> E <b>E</b> KK <b>P</b> ND <b>Q</b> SAHINLKVKGQD <b>G</b> NEVF <b>R</b> IK <b>H</b> TT <b>Q</b> LK <b>K</b> LM <b>T</b> AYCD <b>R</b> Q <b>S</b> VD <b>M</b> NS <b>I</b> AF <b>L</b> FD <b>G</b> RR <b>L</b> RA <b>E</b> Q <b>T</b> PD <b>E</b> LE <b>M</b> ED <b>G</b> DE <b>I</b> D <b>A</b> ML <b>H</b> Q <b>T</b> GG... | 101 |

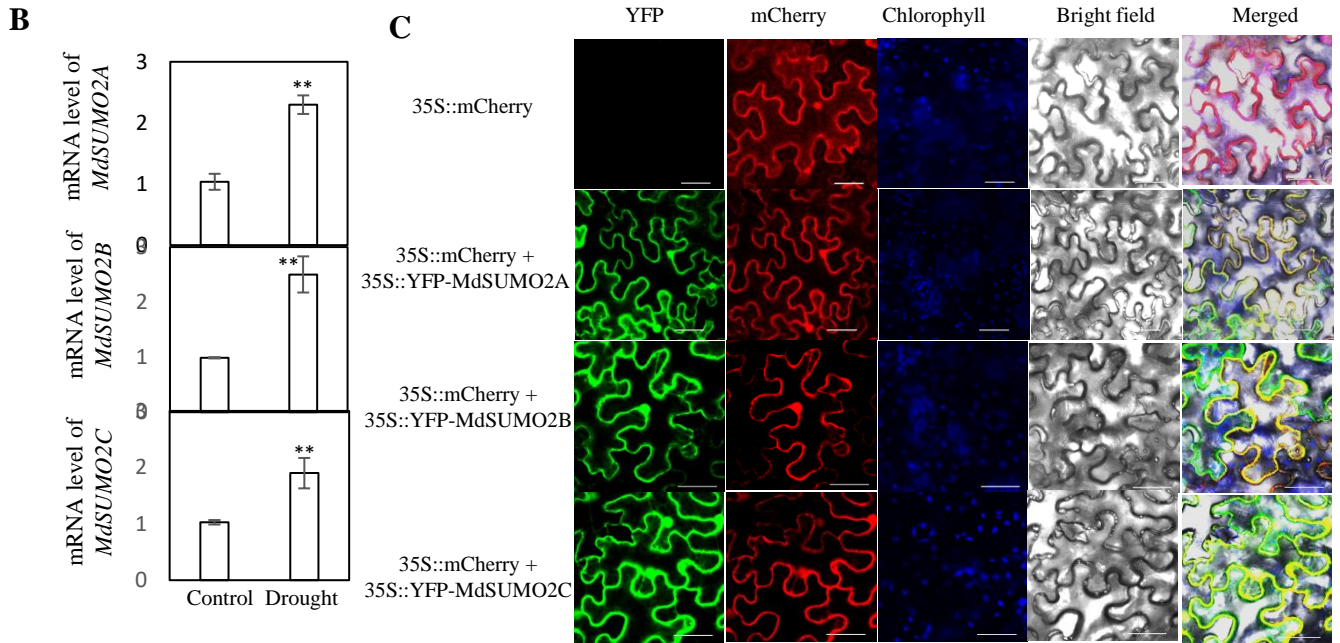

**Fig. 1. Sequences, responses to drought stress, and localization of MdSUMO2s.** (A) Comparison of amino acid sequences of MdSUMO2A, MdSUMO2B, MdSUMO2C in apple. MD03G1194700 and MD11G1211000 were named MdSUMO2A; MD17G1103900 and MD09G1113800 were named MdSUMO2B; MD5G1173700 and MD10G1161600 were named MdSUMO2C. (B) *MdSUMO2* expression in response to drought in 2-month old GL-3 plants which were exposed to drought for 0 and 6 days. (C) Subcellular localization of MdSUMO2s. YFP-MdSUMO2A, YFP-MdSUMO2B, or YFP-MdSUMO2C was transformed into 5-week-old tobacco (*Nicotiana benthamiana*) leaves for 3 days, and YFP and mCherry fluorescent signals were then observed. Bars = 40  $\mu$ m. Error bars indicate standard error (n = 3). Asterisks indicate significant differences based on one-way ANOVA and Tukey test (\*\*,  $P < 0.01$ ).

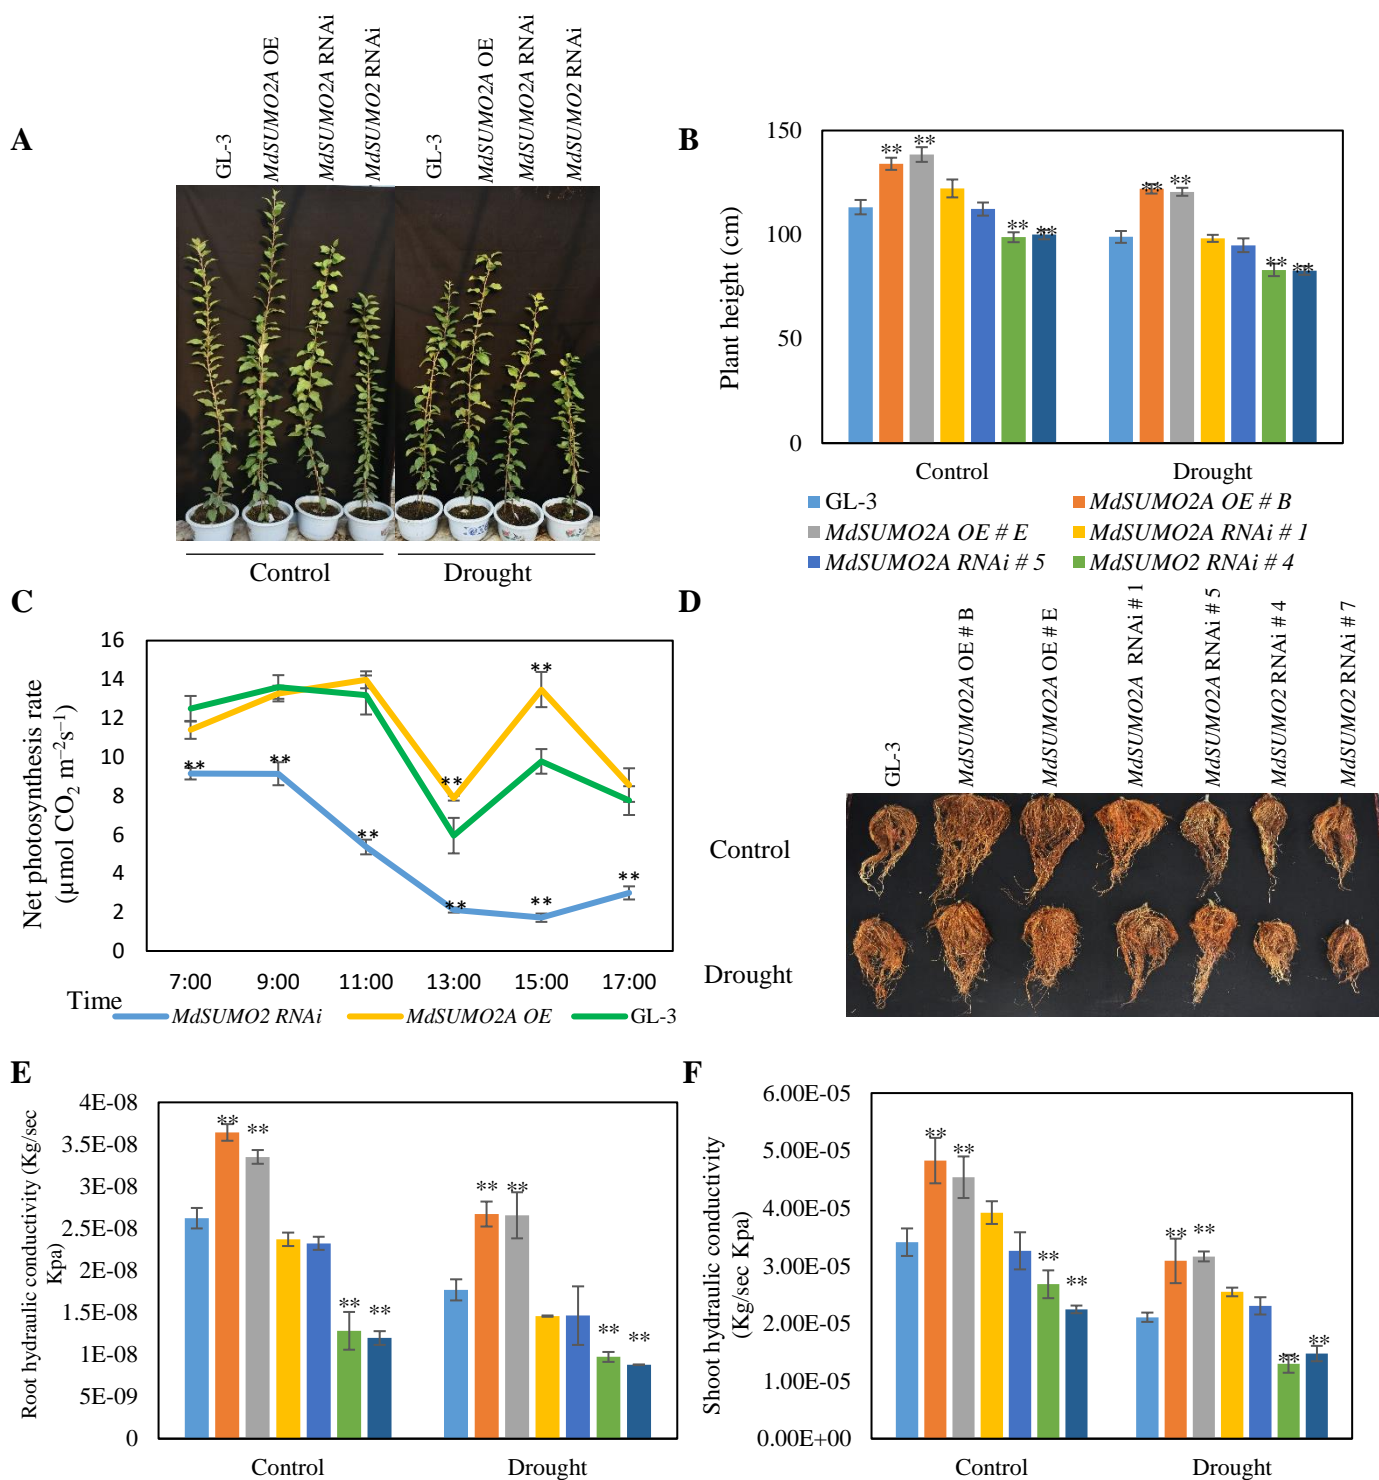

**Fig. 2. *MdsUMO2A* OE plants show increased tolerance to drought stress.** (A) Morphology of *MdsUMO2* transgenic plants under control and long-term drought stress. (B)-(F) Plant height (B), net photosynthesis (C), root morphology (D), root hydraulic conductivity (E), and shoot hydraulic conductivity (F) of GL-3 and *MdsUMO2* transgenic plants under control and long-term drought stress. Plants were exposed to drought for up to 3 months. During treatment, 43-48% soil volumetric water content (VWC) was maintained as control and 18-23% of VWC was maintained as drought treatment. Error bars indicate standard error [n = 12 in (B), 7 in (C), 5 in (E) and (F)]. Asterisks indicate significant differences based on one-way ANOVA and Tukey test (\*,  $P < 0.05$ ; \*\*,  $P < 0.01$ ). OE, overexpression.

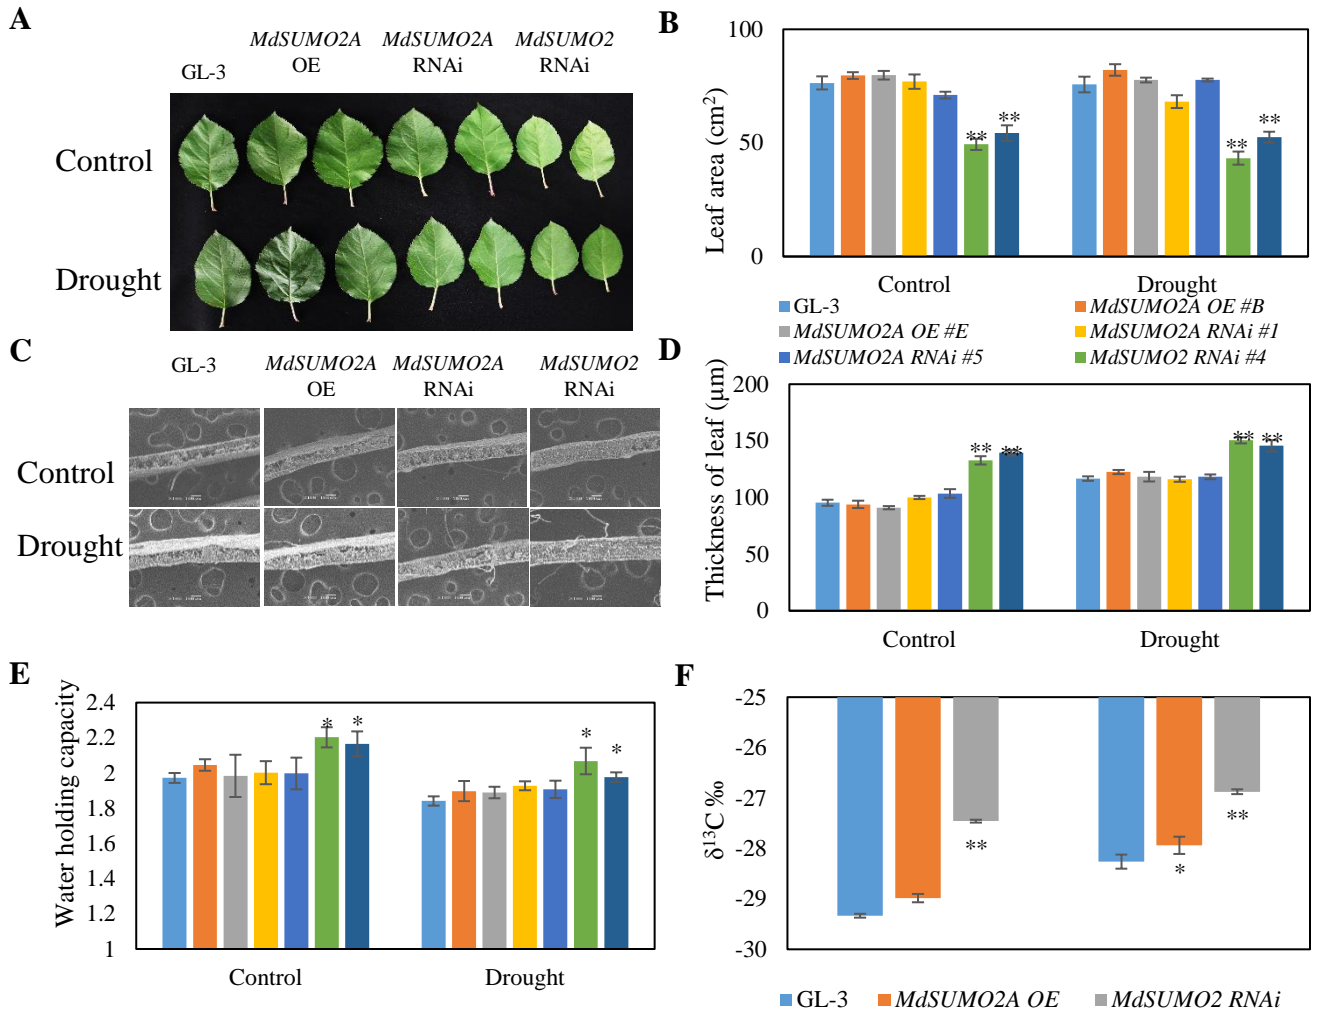

**Fig. 3. *MdSUMO2* RNAi plants display increased tolerance to drought stress.** (A)-(F) Leaf morphology (A), leaf area (B), leaf thickness (C and D), water holding capacity (E), and water use efficiency (F) of GL-3 and *MdSUMO2* transgenic plants under control and long-term drought stress. Leaf thickness was observed using tungsten filament scanning electron microscope (TEM); water holding capacity = (leaf saturated weight-dry weight) /dry weight; water use efficiency was detected by carbon isotope (<sup>13</sup>C) composition. Plants were exposed to drought for up to 3 months. During treatment, 43-48% soil volumetric water content (VWC) was maintained as control and 18-23% of VWC was maintained as drought treatment. Error bars indicate standard error [n = 9 in (B), 16 in (D), 6 in (E), 3 in (F)]. Asterisks indicate significant differences based on one-way ANOVA and Tukey test (\*, *P* < 0.05; \*\*, *P* < 0.01). OE, overexpression.

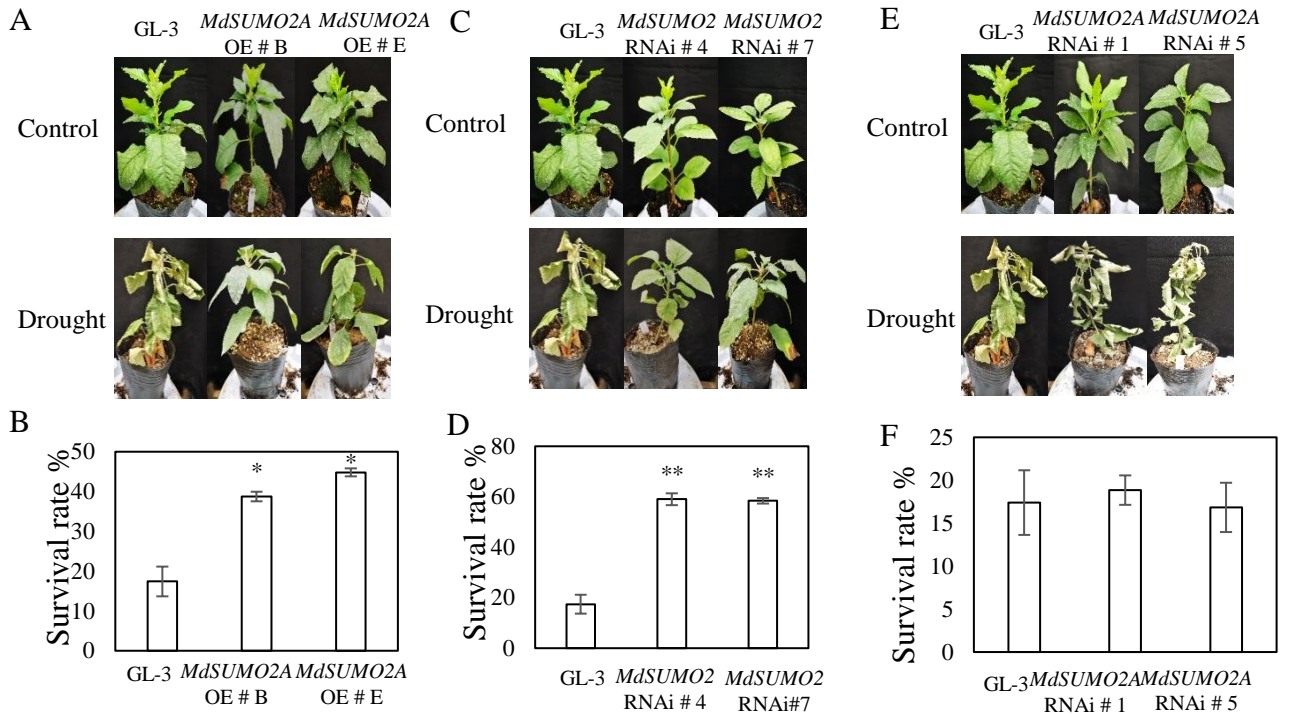

**Fig. 4. Tolerance of *MdSUMO2* transgenic plants and GL-3 in response to short-term drought stress.** (A) Tolerance of *MdSUMO2A* OE and GL-3 plants under short-term drought. (B) Survival rate of plans shown in (A). (C) Tolerance of *MdSUMO2* RNAi and GL-3 plants under short-term drought. (D) Survival rate of plans shown in (C). (E) Tolerance of *MdSUMO2A* RNAi and GL-3 plants under short-term drought. (F) Survival rate of plans shown in (E). Error bars indicate standard error (n = 3). Asterisks indicate significant differences based on one-way ANOVA and Tukey test (\*,  $P < 0.05$ ; \*\*,  $P < 0.01$ ). OE, overexpression.

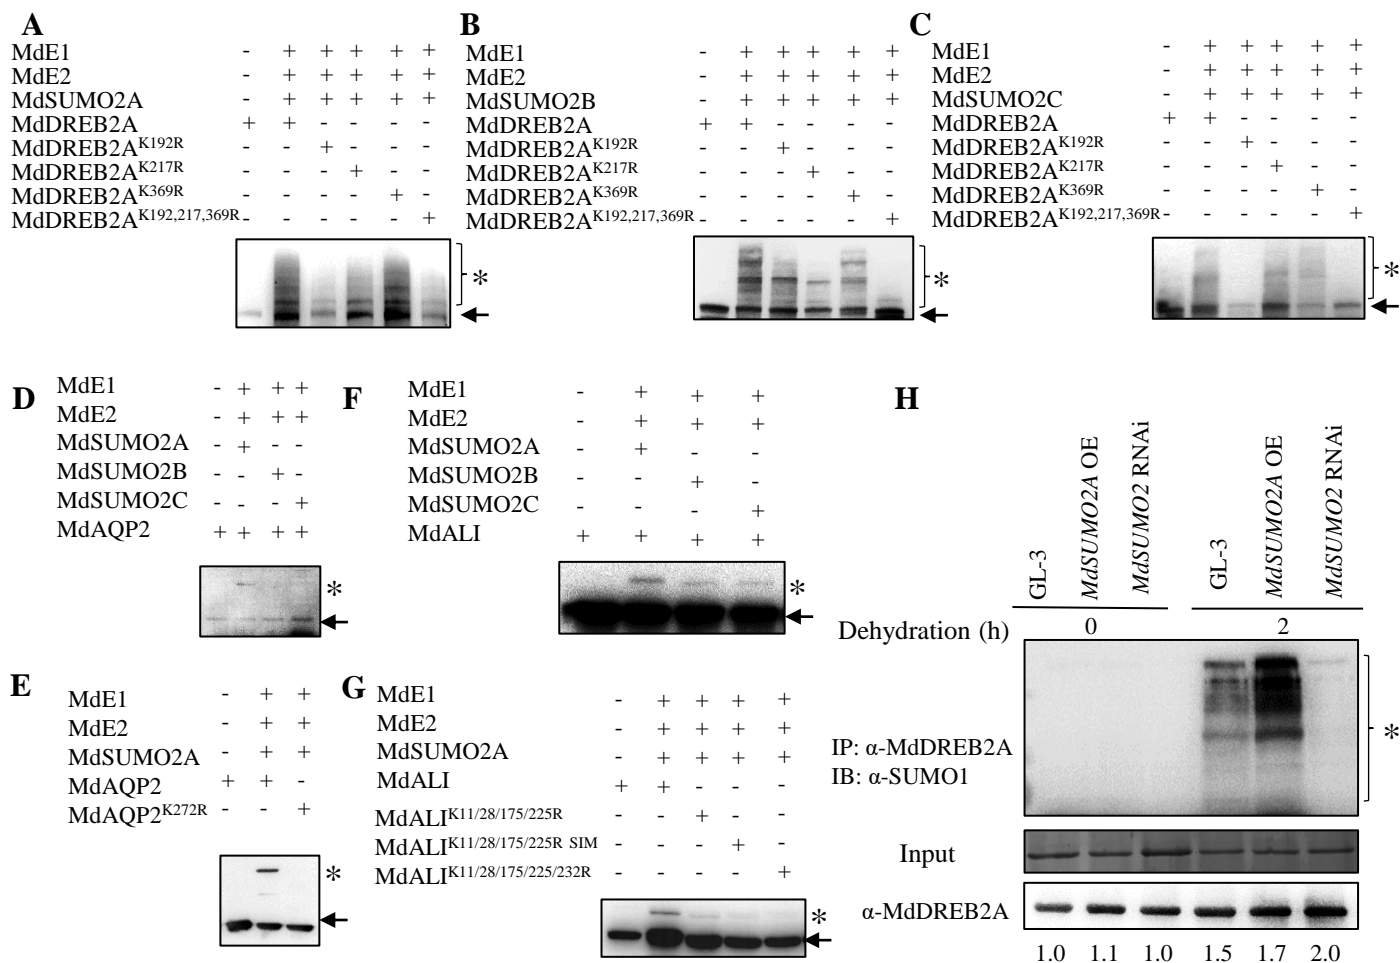

**Fig. 5. SUMOylation of MdDREB2A, MdaQP2, and MdALI using *E. Coli* system.** (A)-(C) MdDREB2A was SUMOylated by MdSUMO2A, MdSUMO2B, and MdSUMO2C. Putative SUMOylation sites (K) of MdDREB2A were mutated to arginine (R). (D) and (E) SUMOylation of AQP2 by MdSUMO2A. Putative SUMOylation site (K272) of MdaQP2 was mutated to arginine (R). (F) and (G) SUMOylation of MdALI by MdSUMO2A, MdSUMO2B, and MdSUMO2C. Putative SUMOylation sites (K) or SIM of MdALI was mutated to arginine (R). (H) SUMOylation of MdDREB2A and MdDREB2A protein in GL-3, *MdSUMO2* RNAi and *MdSUMO2A* OE plants under control or dehydration conditions. \* indicates SUMOylated substrates; arrows indicate substrates. OE, overexpression.

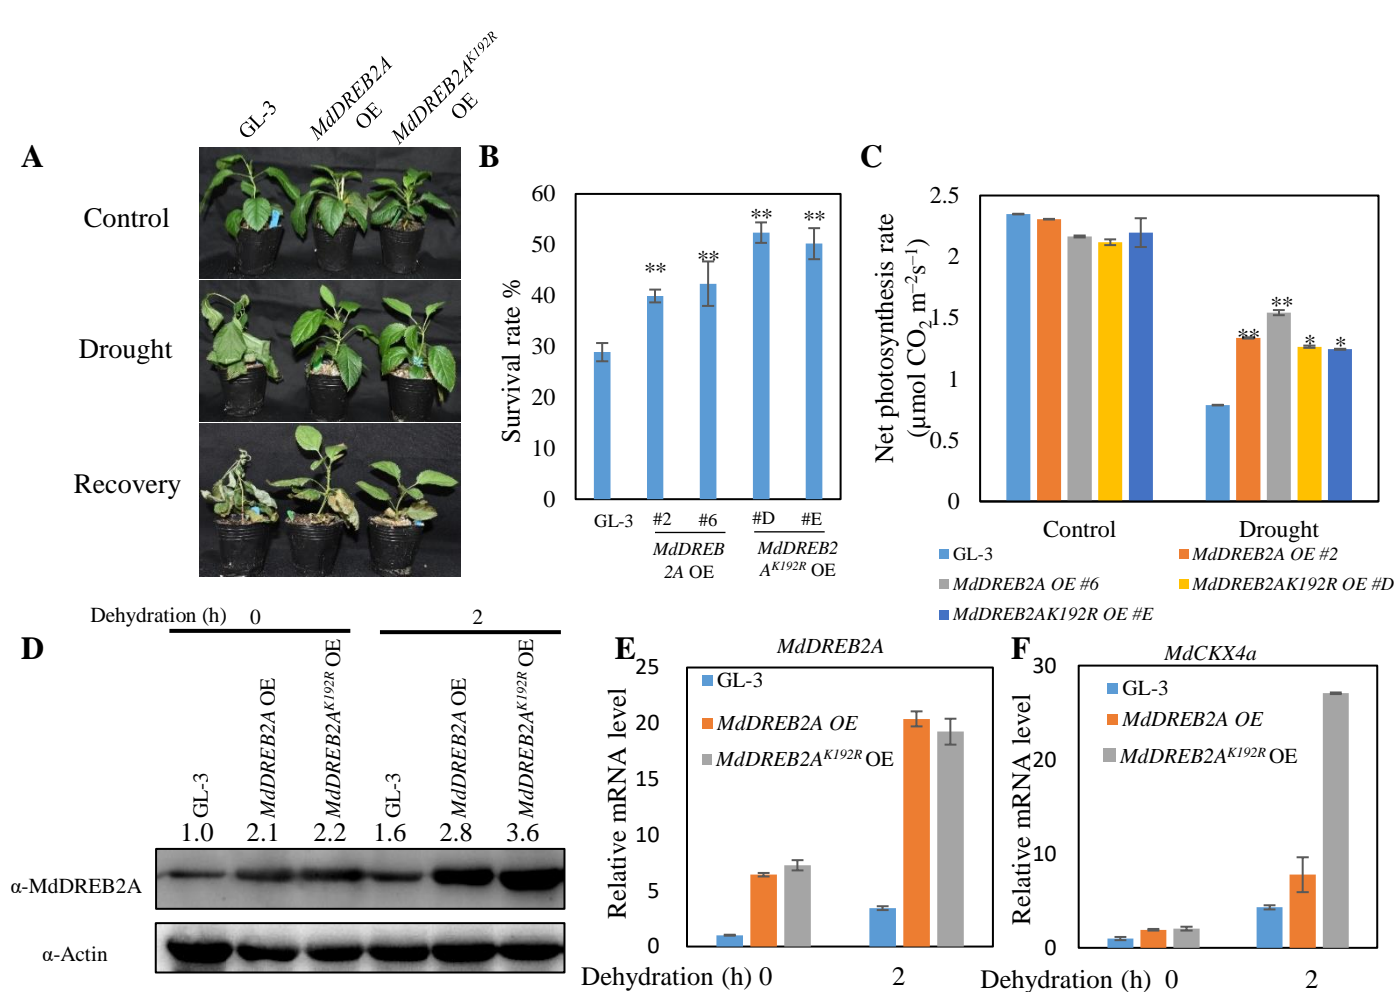

**Fig. 6. SUMOylation of MdDREB2A is critical for drought stress tolerance. (A)** Morphology of *MdDREB2A* OE and *MdDREB2A*<sup>K192R</sup> OE transgenic plants under drought treatment for 3 weeks. **(B)** Survival rate of the plants shown in (A). **(C)** Net photosynthesis rate of *MdDREB2A* OE and *MdDREB2A*<sup>K192R</sup> OE transgenic plants under drought treatment. **(D)** MdDREB2A accumulation in *MdDREB2A*<sup>K192R</sup> OE and *MdDREB2A* OE plants under dehydration treatment. **(E)** and **(F)** mRNA level of *MdDREB2A* and *MdCKX4a* in *MdDREB2A* OE and *MdDREB2A*<sup>K192R</sup> OE transgenic plants under dehydration treatment. Error bars indicate standard error [n = 4 in (B), 13 in (C), 3 in (E) and (F)]. Asterisks indicate significant differences based on one-way ANOVA and Tukey test (\*,  $P < 0.05$ ; \*\*,  $P < 0.01$ ). OE, overexpression.

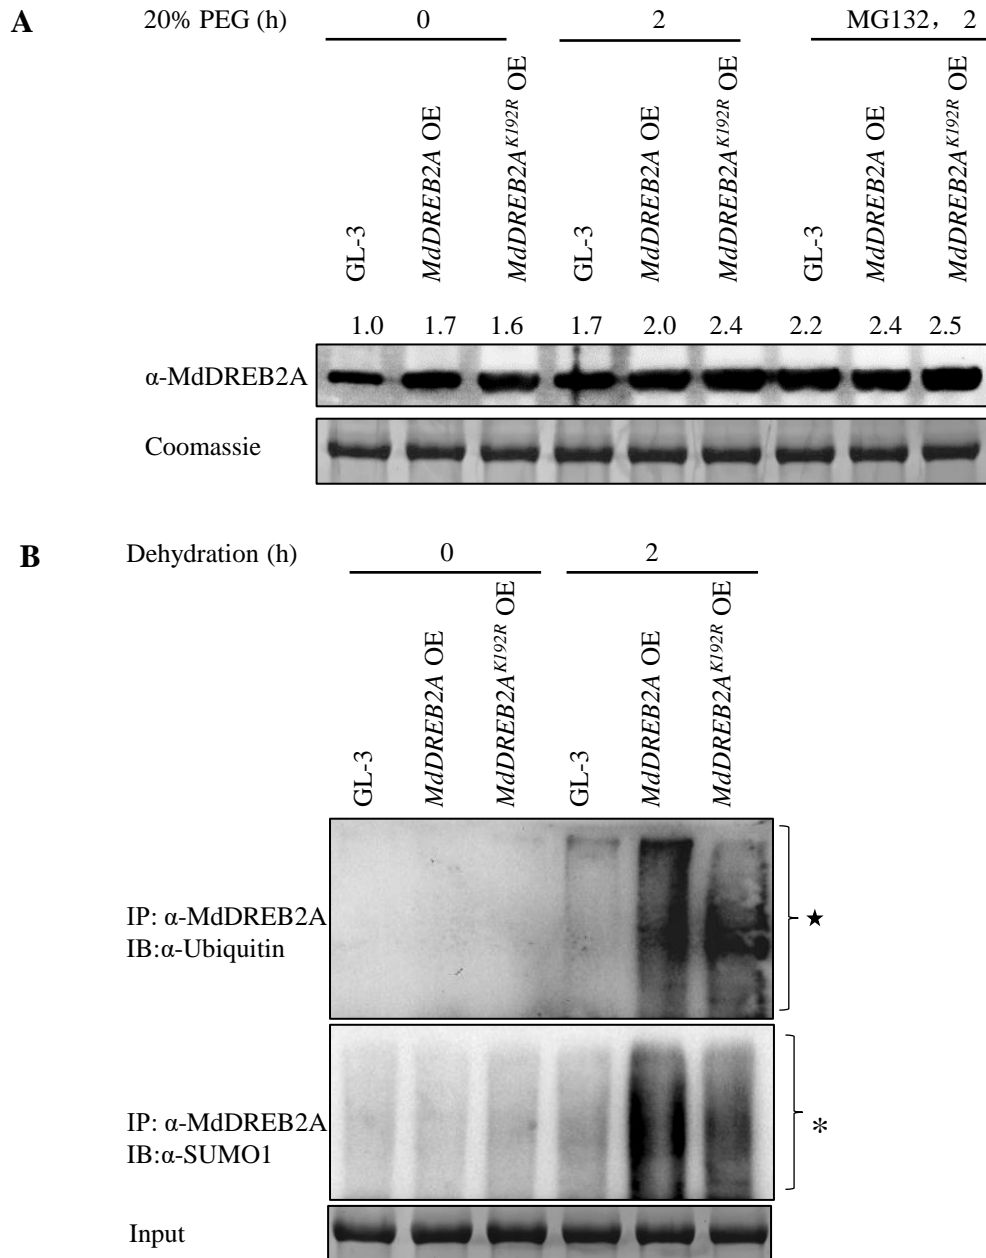

**Fig. 7. SUMOylation of MdDREB2A couples with ubiquitination mediated by 26S proteasome pathway under drought stress.** (A) MdDREB2A accumulation in *MdDREB2A* OE and *MdDREB2A*<sup>K192R</sup> OE transgenic plants under simulated drought stress with or without 50  $\mu$ M MG132 treatment. (B) Ubiquitination and SUMOylation of MdDREB2A in *MdDREB2A* OE and *MdDREB2A*<sup>K192R</sup> OE plants in response to dehydration. \* indicates SUMOylated substrates;  $\star$  indicates ubiquitinated substrates. OE, overexpression.

**A**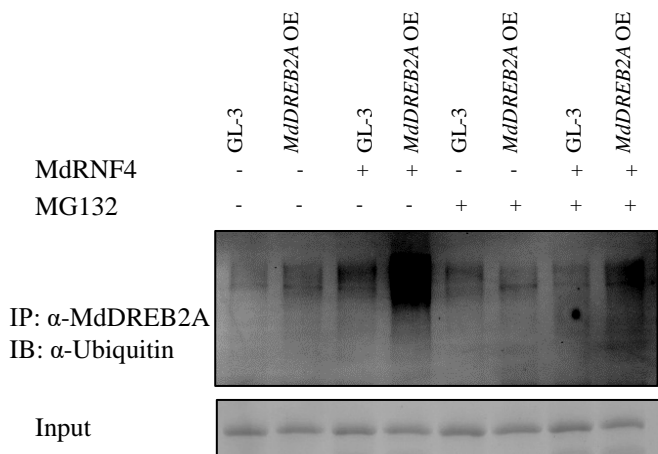**B**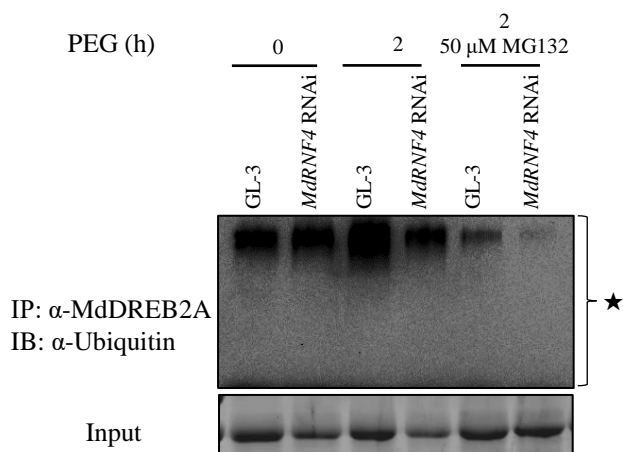**C**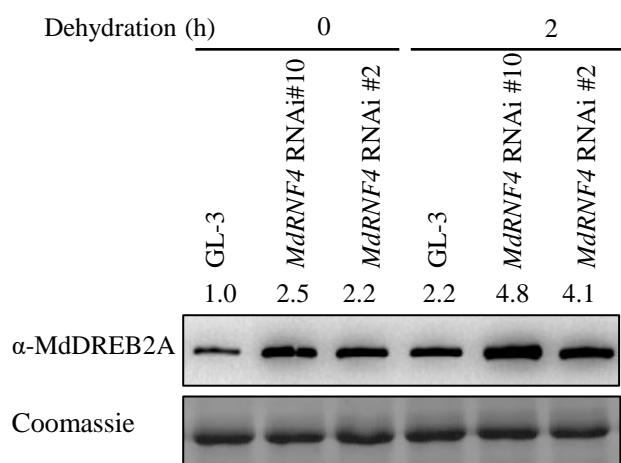**D**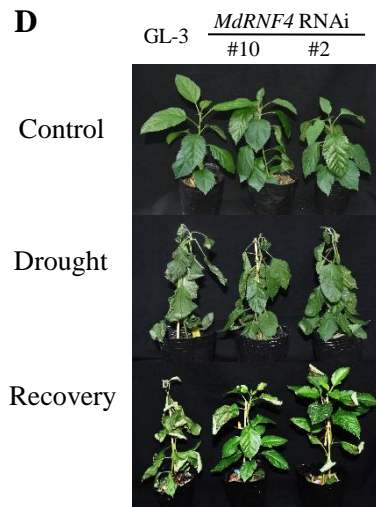**E**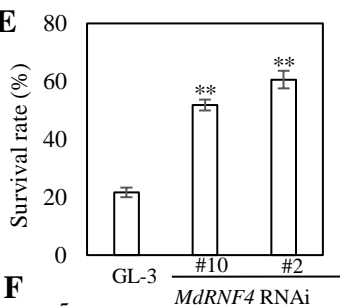**F**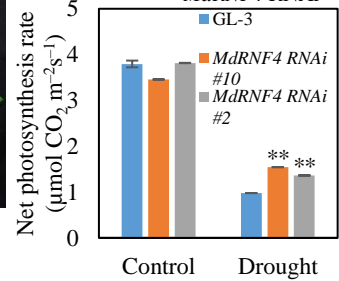**G**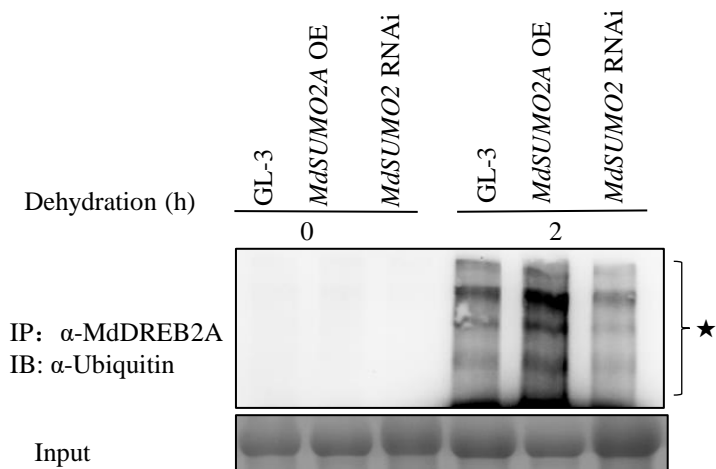**H**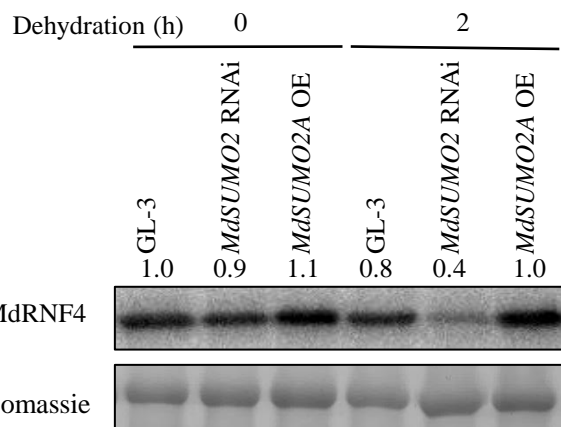



**Fig. 8. MdRNF4 mediates degradation of SUMOylated MdDREB2A under dehydration conditions.** (A) Effects of recombinant MdRNF4 on ubiquitination of MdDREB2A under simulated drought stress. Proteins were extracted from PEG-treated GL-3 and *MdDREB2A* OE plants, and recombinant MdRNF4 or 50  $\mu$ M MG132 was added. (B) Ubiquitination of MdDREB2A in *MdRNF4* RNAi plants in response to dehydration. (C) MdDREB2A accumulation in *MdRNF4* RNAi plants in response to dehydration. (D) Morphology of GL-3 and *MdRNF4* RNAi plants under control and drought stress conditions. (E) and (F) Survival rate (E) and photosynthetic capacity (F) of the plants shown in (D). (G) Ubiquitination of MdDREB2A in *MdSUMO2* RNAi or *MdSUMO2A* OE plants in response to dehydration. (H) MdRNF4 level in *MdSUMO2* RNAi or *MdSUMO2A* OE plants in response to dehydration. Error bars indicate standard error [n = 8 in (D), 3 in (E), 20 in (F)]. Asterisks indicate significant differences based on one-way ANOVA and Tukey test (\*,  $P < 0.05$ ; \*\*,  $P < 0.01$ ). OE, overexpression. ★ indicates ubiquitinated substrates. OE, overexpression.

## Parsed Citations

- Agarwal, P., Agarwal, P.K., Nair, S., Sopory, S.K., and Reddy, M.K. (2007). Stress-inducible DREB2A transcription factor from *Pennisetum glaucum* is a phosphoprotein and its phosphorylation negatively regulates its DNA-binding activity. *Mol Genet Genomics* 277, 189.  
Google Scholar: [Author Only](#) [Title Only](#) [Author and Title](#)
- An, J.P., Wang, X.F., Zhang, X.W., Bi, S.Q., You, C.X., and Hao, Y.J. (2019). MdBBX22 regulates UV-B-induced anthocyanin biosynthesis through regulating the function of MdHY5 and is targeted by MdBT2 for 26S proteasome-mediated degradation. *Plant Biotechnol J* 17, 2231-2233.  
Google Scholar: [Author Only](#) [Title Only](#) [Author and Title](#)
- An, J.P., Wang, X.F., Espley, R.V., Lin-Wang, K., Bi, S.Q., You, C.X., and Hao, Y.J. (2020). An apple B-Box protein MdBBX37 modulates anthocyanin biosynthesis and hypocotyl elongation synergistically with MdMYBs and MdHY5. *Plant Cell Physiol*. 61, 130-143.  
Google Scholar: [Author Only](#) [Title Only](#) [Author and Title](#)
- Anyia, A.O., and Herzog, H. (2004). Water-use efficiency, leaf area and leaf gas exchange of cowpeas under mid-season drought. *Europ. J. Agronomy* 20, 327-339.  
Google Scholar: [Author Only](#) [Title Only](#) [Author and Title](#)
- Basu, S., Ramegowda, V., Kumar, A., and Pereira, A. (2016). Plant adaptation to drought stress. *F1000research* 5, 1554.  
Google Scholar: [Author Only](#) [Title Only](#) [Author and Title](#)
- Castro, P.H., Tavares, R.M., Bejarano, E.R., and Azevedo, H. (2012). SUMO, a heavyweight player in plant abiotic stress responses. *Cell Mol Life Sci* 69, 3269-3283.  
Google Scholar: [Author Only](#) [Title Only](#) [Author and Title](#)
- Catala, R., Ouyang, J., Abreu, I.A., Hu, Y., Seo, H., Zhang, X., and Chua, N.H. (2007). The Arabidopsis E3 SUMO ligase SIZ1 regulates plant growth and drought responses. *Plant cell* 19, 2952-2966.  
Google Scholar: [Author Only](#) [Title Only](#) [Author and Title](#)
- Chen, M., Wang, Q., Cheng, X., Xu, Z., Li, L., Ye, X., Xia, L., and Ma, Y. (2007). GmDREB2, a soybean DRE-binding transcription factor, conferred drought and high-salt tolerance in transgenic plants. *Biochem. Biophys. Res. Commun.* 353, 299-305.  
Google Scholar: [Author Only](#) [Title Only](#) [Author and Title](#)
- Chen, M.L., Fu, X.M., Liu, J.Q., Ye, T.T., Hou, S.Y., Huang, Y.Q., Yuan, B.F., Wu, Y., and Feng, Y.Q. (2012). Highly sensitive and quantitative profiling of acidic phytohormones using derivatization approach coupled with nano-LC-ESI-Q-TOF-MS analysis. *J Chromatogr B Analyt Technol Biomed Life Sci* 905, 67-74.  
Google Scholar: [Author Only](#) [Title Only](#) [Author and Title](#)
- Clough, S., and Bent, A. (1998). Floral dip: a simplified method for *Agrobacterium*-mediated transformation of *Arabidopsis thaliana*. *Plant J.* 16, 735-743.  
Google Scholar: [Author Only](#) [Title Only](#) [Author and Title](#)
- Colby, T., Matthai, A., Boeckelmann, A., and Stuible, H.P. (2006). SUMO-conjugating and SUMO-deconjugating enzymes from *Arabidopsis*. *Plant Physiol* 142, 318-332.  
Google Scholar: [Author Only](#) [Title Only](#) [Author and Title](#)
- Cui, M., Zhang, W., Zhang, Q., Xu, Z., Zhu, Z., Duan, F., and Wu, R. (2011). Induced over-expression of the transcription factor OsDREB2A improves drought tolerance in rice. *Plant physiology and biochemistry : PPB* 49, 1384-1391.  
Google Scholar: [Author Only](#) [Title Only](#) [Author and Title](#)
- Dai, A.G. (2013). Increasing drought under global warming in observations and models. *Nature Climate Change* 3, 52-58.  
Google Scholar: [Author Only](#) [Title Only](#) [Author and Title](#)
- Dai, H., Li, W., Han, G., Yang, Y., Ma, Y., Li, H., and Zhang, Z. (2013). Development of a seedling clone with high regeneration capacity and susceptibility to *Agrobacterium* in apple. *Sci. Hortic* 164, 202-208.  
Google Scholar: [Author Only](#) [Title Only](#) [Author and Title](#)
- Dohmen, R.J. (2004). SUMO protein modification. *Biochim Biophys Acta* 1695, 113-131.  
Google Scholar: [Author Only](#) [Title Only](#) [Author and Title](#)
- Elrouby, N. (2015). Analysis of small ubiquitin-like modifier (SUMO) targets reflects the essential nature of protein SUMOylation and provides insight to elucidate the role of SUMO in plant development. *Plant Physiol* 169, 1006-1017.  
Google Scholar: [Author Only](#) [Title Only](#) [Author and Title](#)
- Elrouby, N., and Coupland, G. (2010). Proteome-wide screens for small ubiquitin-like modifier (SUMO) substrates identify *Arabidopsis* proteins implicated in diverse biological processes. *P Natl Acad Sci USA* 107, 17415-17420.  
Google Scholar: [Author Only](#) [Title Only](#) [Author and Title](#)
- Galanty, Y., Belotserkovskaya, R., Coates, J., and Jackson, S.P. (2012). RNF4, a SUMO-targeted ubiquitin E3 ligase, promotes DNA double-strand break repair. *Genes Dev* 26, 1179-1195.  
Google Scholar: [Author Only](#) [Title Only](#) [Author and Title](#)

Geng, D.L., Shen, X., Xie, Y., Yang, Y., Bian, R., Gao, Y., Li, P., Sun, L., Feng, H., Ma, F., and Guan, Q. (2020). Regulation of phenylpropanoid biosynthesis by MdMYB88 and MdMYB124 contributes to pathogen and drought resistance in apple. *Hortic Res* 7.

Google Scholar: [Author Only](#) [Title Only](#) [Author and Title](#)

Geng, D.L., Chen, P.X., Shen, X.X., Zhang, Y., Li, X.W., Jiang, L.J., Xie, Y.P., Niu, C.D., Zhang, J., Huang, X.H., Ma, F.W., and Guan, Q.M. (2018). MdMYB88 and MdMYB124 enhance drought tolerance by modulating root vessels and cell walls in apple. *Plant Physiol* 178, 1296-1309.

Google Scholar: [Author Only](#) [Title Only](#) [Author and Title](#)

Geoffroy, M.-C., and Hay, R.T. (2009). An additional role for SUMO in ubiquitin-mediated proteolysis. *Nat Rev Mol Cell Biol* 10, 564.

Google Scholar: [Author Only](#) [Title Only](#) [Author and Title](#)

Guan, Q.M., Lu, X.Y., Zeng, H.T., Zhang, Y.Y., and Zhu, J.H. (2013). Heat stress induction of miR398 triggers a regulatory loop that is critical for thermotolerance in *Arabidopsis*. *Plant J* 74, 840-851.

Google Scholar: [Author Only](#) [Title Only](#) [Author and Title](#)

Holefors, A., Xue, Z.T., and Welander, M. (1998). Transformation of the apple rootstock M26 with the rolA gene and its influence on growth. *J Plant Physiol* 136, 69-78.

Google Scholar: [Author Only](#) [Title Only](#) [Author and Title](#)

Hu, L., Xie, Y., Fan, S., Wang, Z., Wang, F., Zhang, B., Li, H., Song, J., and Kong, L. (2018). Comparative analysis of root transcriptome profiles between drought-tolerant and susceptible wheat genotypes in response to water stress. *Plant Sci* 272, 276.

Google Scholar: [Author Only](#) [Title Only](#) [Author and Title](#)

Karan, R., and Subudhi, P.K. (2012). A stress inducible SUMO conjugating enzyme gene (SaSce9) from a grass halophyte *Spartina alterniflora* enhances salinity and drought stress tolerance in *Arabidopsis*. *BMC Plant Biol* 12, 187-187.

Google Scholar: [Author Only](#) [Title Only](#) [Author and Title](#)

Karimi, M., and Hilson, D.P. (2007). Recombinational cloning with plant gateway vectors. *Plant Physiol* 145, 1144-1154.

Google Scholar: [Author Only](#) [Title Only](#) [Author and Title](#)

Kim, J.-S., Mizoi, J., Yoshida, T., Fujita, Y., Nakajima, J., Otori, T., Todaka, D., Nakashima, K., Hirayama, T., Shinozaki, K., and Yamaguchi-Shinozaki, K. (2011). An ABRE promoter sequence is involved in osmotic stress-responsive expression of the DREB2A gene, which encodes a transcription factor regulating drought-inducible genes in *Arabidopsis*. *Plant Cell Physiol* 52, 2136-2146.

Google Scholar: [Author Only](#) [Title Only](#) [Author and Title](#)

Kim, J., Song, J., and Seo, H. (2017). Post-translational modifications of *Arabidopsis* E3 SUMO ligase AtSIZ1 are controlled by environmental conditions. *FEBS Open Bio* 7, 1622-1634.

Google Scholar: [Author Only](#) [Title Only](#) [Author and Title](#)

Kumar, R., Gonzalez-Prieto, R., Xiao, Z., Verlaan-de Vries, M., and Vertegaal, A.C.O. (2017). The STUbL RNF4 regulates protein group SUMOylation by targeting the SUMO conjugation machinery. *Nat Commun* 8.

Google Scholar: [Author Only](#) [Title Only](#) [Author and Title](#)

Li, X.W., Chen, P.X., Xie, Y.P., Yan, Y., Wang, L.P., Dang, H., Zhang, J., Xu, L.Y., Ma, F.W., and Guan, Q.M. (2020). Apple SERRATE negatively mediates drought resistance by regulating MdMYB88 and MdMYB124 and microRNA biogenesis. *Hortic Res* 7.

Google Scholar: [Author Only](#) [Title Only](#) [Author and Title](#)

Li, X.W., Xie, Y., Lu, L., Yan, M., Fang, N., Xu, J., Wang, L., Yan, Y., Zhao, T., van Nocker, S., Ma, F., Liang, D., and Guan, Q. (2019). Contribution of methylation regulation of MpDREB2A promoter to drought resistance of *Mauls prunifolia*. *Plant Soil* 441, 15-32.

Google Scholar: [Author Only](#) [Title Only](#) [Author and Title](#)

Liao, X., Guo, X., Wang, Q., Wang, Y., Zhao, D., Yao, L., Wang, S., Liu, G., and Li, T. (2016). Overexpression of MsDREB6.2 results in cytokinin-deficient developmental phenotypes and enhances drought tolerance in transgenic apple plants. *Plant J* 89.

Google Scholar: [Author Only](#) [Title Only](#) [Author and Title](#)

Liu, Q., Kasuga, M., Sakuma, Y., Abe, H., Miura, S., Yamaguchi-Shinozaki, K., and Shinozaki, K. (1998). Two transcription factors, DREB1 and DREB2, with an EREBP/AP2 DNA binding domain separate two cellular signal transduction pathways in drought- and low-temperature-responsive gene expression, respectively, in *Arabidopsis*. *Plant Cell* 10, 1391-1406.

Google Scholar: [Author Only](#) [Title Only](#) [Author and Title](#)

Maio, F., Helderma, T.A., Arroyo-Mateos, M., van der Wolf, M., Boeren, S., Prins, M., and van den Burg, H.A. (2020). Identification of tomato proteins that interact with replication initiator protein (Rep) of the geminivirus TYLCV. *Front Plant Sci* 11, 1069.

Google Scholar: [Author Only](#) [Title Only](#) [Author and Title](#)

Mao, H., Wang, H., Liu, S., Li, Z., Yang, X., Yan, J., Li, J., Tran, L.S., and Qin, F. (2015). A transposable element in a NAC gene is associated with drought tolerance in maize seedlings. *Nat Commun* 6, 8326.

Google Scholar: [Author Only](#) [Title Only](#) [Author and Title](#)

Meng, C., Zhang, W., Zhang, Q., Xu, Z., Zhu, Z., Duan, F., and Wu, R. (2011). Induced over-expression of the transcription factor OsDREB2A improves drought tolerance in rice. *Plant physiology and biochemistry: PPB* 49, 1384-1391.

Google Scholar: [Author Only](#) [Title Only](#) [Author and Title](#)

Miller, M.J., and Vierstra, R.D. (2011). Mass spectrometric identification of SUMO substrates provides insights into heat stress-induced SUMOylation in plants. *Plant Signal Behav* 6, 130-133.

Google Scholar: [Author Only Title Only Author and Title](#)

Miller, M.J., Barrett-Wilt, G.A., Hua, Z., and Vierstra, R.D. (2010). Proteomic analyses identify a diverse array of nuclear processes affected by small ubiquitin-like modifier conjugation in *Arabidopsis*. *P Natl Acad Sci USA* 107, 16512-16517.

Google Scholar: [Author Only Title Only Author and Title](#)

Miura, K., Okamoto, H., Okuma, E., Shiba, H., Kamada, H., Hasegawa, P., and Murata, Y. (2013). SIZ1 deficiency causes reduced stomatal aperture and enhanced drought tolerance via controlling salicylic acid-induced accumulation of reactive oxygen species in *Arabidopsis*. *Plant J* 73, 91-104.

Google Scholar: [Author Only Title Only Author and Title](#)

Miura, K., Jin, J.B., Lee, J., Yoo, C.Y., Stirm, V., Miura, T., Ashworth, E.N., Bressan, R.A., Yun, D.J., and Hasegawa, P.M. (2007). SIZ1-mediated sumoylation of ICE1 controls CBF3/DREB1A expression and freezing tolerance in *Arabidopsis*. *Plant Cell* 19, 1403-1414.

Google Scholar: [Author Only Title Only Author and Title](#)

Mizoi, J., Ohori, T., Moriwaki, T., Kidokoro, S., Todaka, D., Maruyama, K., Kusakabe, K., Osakabe, Y., Shinozaki, K., and Yamaguchi-Shinozaki, K. (2013). GmDREB2A2, a canonical DEHYDRATION-RESPONSIVE ELEMENT-BINDING PROTEIN2-type transcription factor in soybean, is posttranslationally regulated and mediates dehydration-responsive element-dependent gene expression. *Plant Physiol* 161, 346-361.

Google Scholar: [Author Only Title Only Author and Title](#)

Morimoto, K., Ohama, N., Kidokoro, S., Mizoi, J., Takahashi, F., Todaka, D., Mogami, J., Sato, H., Qin, F., Kim, J.-S., Fukao, Y., Fujiwara, M., Shinozaki, K., and Yamaguchi-Shinozaki, K. (2017). BPM-CUL3 E3 ligase modulates thermotolerance by facilitating negative regulatory domain-mediated degradation of DREB2A in *Arabidopsis*. *P Natl Acad Sci USA* 114, E8528-E8536.

Google Scholar: [Author Only Title Only Author and Title](#)

Nabil, E., Mitzi Villajuana, B., Aimone, P., and George, C. (2014). Identification of *Arabidopsis* SUMO-interacting proteins that regulate chromatin activity and developmental transitions. *P Natl Acad Sci USA* 110, 19956-19961.

Google Scholar: [Author Only Title Only Author and Title](#)

Neelam, M., Li, S., Xunlu, Z., Jennifer, S., Anurag, P.S., Xiaojie, Y., Necla, P., Nardana, E., Hong, L., and Guoxin, S. (2017). Overexpression of the rice SUMO E3 ligase gene OsSIZ1 in cotton enhances drought and heat tolerance, and substantially improves fiber yields in the field under reduced irrigation and rainfed conditions. *Plant Cell Physiol.*, 735-746.

Google Scholar: [Author Only Title Only Author and Title](#)

Niu, C.D., Li, H., Jiang, L., Yan, M., Li, C., Geng, D., Xie, Y., Yan, Y., Shen, X., Chen, P., Dong, J., Ma, F., and Guan, Q. (2019). Genome-wide identification of drought-responsive microRNAs in two sets of *Malus* from interspecific hybrid progenies. *Hortic Res* 6, 75.

Google Scholar: [Author Only Title Only Author and Title](#)

Novatchkova, M., Budhiraja, R., Coupland, G., Eisenhaber, F., and Bachmair, A. (2004). SUMO conjugation in plants. *Planta* 220, 1-8.

Google Scholar: [Author Only Title Only Author and Title](#)

Nurdiani, D., Widyajyantie, D., and Nugroho, S. (2018). OsSCE1 encoding SUMO E2-conjugating enzyme involves in drought stress response of *Oryza sativa*. *Rice Science* 25, 73-81.

Google Scholar: [Author Only Title Only Author and Title](#)

Okada, S., Nagabuchi, M., Takamura, Y., Nakagawa, T., Shinmyozu, K., Nakayama, J.-i., and Tanaka, K. (2009). Reconstitution of *Arabidopsis thaliana* SUMO pathways in *E. coli*: functional evaluation of SUMO machinery proteins and mapping of SUMOylation sites by mass spectrometry. *Plant Cell Physiol* 50, 1049-1061.

Google Scholar: [Author Only Title Only Author and Title](#)

Polania, J.A., Poschenrieder, C., Beebe, S., and Rao, I.M. (2016). Effective use of water and increased dry matter partitioned to grain contribute to yield of common bean improved for drought resistance. *Front Plant Sci* 7.

Google Scholar: [Author Only Title Only Author and Title](#)

Qin, F., Kakimoto, M., Sakuma, Y., Maruyama, K., Osakabe, Y., Tran, L., Shinozaki, K., and Yamaguchi-Shinozaki, K. (2007). Regulation and functional analysis of ZmDREB2A in response to drought and heat stresses in *Zea mays* L. *Plant J* 50, 54-69.

Google Scholar: [Author Only Title Only Author and Title](#)

Qin, F., Sakuma, Y., Tran, L.S., Maruyama, K., Kidokoro, S., Fujita, Y., Fujita, M., Umezawa, T., Sawano, Y., Miyazono, K., Tanokura, M., Shinozaki, K., and Yamaguchi-Shinozaki, K. (2008). *Arabidopsis* DREB2A-interacting proteins function as RING E3 ligases and negatively regulate plant drought stress-responsive gene expression. *Plant Cell* 20, 1693-1707.

Google Scholar: [Author Only Title Only Author and Title](#)

Reis, R.R., Dias Brito da Cunha, B.A., Martins, P.K., Bazzo Martins, M.T., Alekcevetch, J.C., Chalfun-Junior, A., Andrade, A.C., Ribeiro, A.P., Qin, F., Mizoi, J., Yamaguchi-Shinozaki, K., Nakashima, K., Correa Carvalho, J.d.F., Ferreira de Sousa, C.A., Nepomuceno, A.L., Kobayashi, A.K., and Correa Molinari, H.B. (2014). Induced over-expression of *ArDREB2A* improves drought tolerance in sugarcane. *Plant Sci* 221, 59-68.

Google Scholar: [Author Only Title Only Author and Title](#)

Rytz, T., Miller, M., McLoughlin, F., Augustine, R., Marshall, R., Juan, Y., Charng, Y., Scalf, M., Smith, L., and Vierstra, R. (2018).

**SUMOylome profiling reveals a diverse array of nuclear targets modified by the SUMO ligase SIZ1 during heat stress. *Plant Cell* 30, 1077-1099.**

Google Scholar: [Author Only Title Only Author and Title](#)

**Rytz, T.C., Miller, M.J., and Vierstra, R.D. (2016). Purification of SUMO Conjugates from Arabidopsis for Mass Spectrometry Analysis. *Methods Mol Biol*, 257-281.**

Google Scholar: [Author Only Title Only Author and Title](#)

**Sadhukhan, A, Panda, S.K., and Sahoo, L. (2014). The cowpea RING ubiquitin ligase VuDRIP interacts with transcription factor VuDREB2A for regulating abiotic stress responses. *Plant Physiol Biochem* 83, 51-56.**

Google Scholar: [Author Only Title Only Author and Title](#)

**Saitoh, H., Uwada, J., and Azusa, K. (2009). Strategies for the expression of SUMO-modified target proteins in Escherichia coli. *Methods Mol Biol* 497, 211-221.**

Google Scholar: [Author Only Title Only Author and Title](#)

**Sakuma, Y., Maruyama, K., Qin, F., Osakabe, Y., Shinozaki, K., and Yamaguchi-Shinozaki, K. (2006a). Dual function of an Arabidopsis transcription factor DREB2A in water-stress-responsive and heat-stress-responsive gene expression. *P Natl Acad Sci USA* 103, 18822-18827.**

Google Scholar: [Author Only Title Only Author and Title](#)

**Sakuma, Y., Maruyama, K., Osakabe, Y., Qin, F., Seki, M., Shinozaki, K., and Yamaguchi-Shinozaki, K. (2006b). Functional analysis of an Arabidopsis transcription factor, DREB2A, involved in drought-responsive gene expression. *Plant Cell* 18, 1292-1309.**

Google Scholar: [Author Only Title Only Author and Title](#)

**Seiler, C., Harshavardhan, V.T., Rajesh, K., Reddy, P.S., Strickert, M., Rolletschek, H., Scholz, U., Wobus, U., and Sreenivasulu, N. (2011). ABA biosynthesis and degradation contributing to ABA homeostasis during barley seed development under control and terminal drought-stress conditions. *J Exp Bot* 62, 2615-2632.**

Google Scholar: [Author Only Title Only Author and Title](#)

**Smalle, Jan, Vierstra, Richard, and D. (2004). The ubiquitin 26S proteasome proteolytic pathway. *Annu Rev Plant Biol* 55, 555-590.**

Google Scholar: [Author Only Title Only Author and Title](#)

**Sobko, A, Ma, H., and Firtel, R.A Regulated SUMOylation and ubiquitination of DdMEK1 is required for proper chemotaxis. *Dev Cell* 2, 0-756.**

**Srivastava, A, Zhang, C., Caine, R., Gray, J., and Sadanandom, A (2017). Rice SUMO protease Overly Tolerant to Salt 1 targets the transcription factor, OsbZIP23 to promote drought tolerance in rice. *Plant J*.**

Google Scholar: [Author Only Title Only Author and Title](#)

**Sun, H., Leverson, J.D., and Hunter, T. (2007). Conserved function of RNF4 family proteins in eukaryotes: targeting a ubiquitin ligase to SUMOylated proteins. *EMBO J* 26, 4102-4112.**

Google Scholar: [Author Only Title Only Author and Title](#)

**Sun, J., Gu, J., Zeng, J., Han, S., Song, A., Chen, F., Fang, W., Jiang, J., and Chen, S. (2013a). Changes in leaf morphology, antioxidant activity and photosynthesis capacity in two different drought-tolerant cultivars of chrysanthemum during and after water stress. *Sci. Hortic* 161, 249-258.**

Google Scholar: [Author Only Title Only Author and Title](#)

**Sun, X., Wang, P., Jia, X., Huo, L.Q., Che, R.M., and Ma, F.W. (2018). Improvement of drought tolerance by overexpressing MdATG18a is mediated by modified antioxidant system and activated autophagy in transgenic apple. *Plant Biotechnol J* 16, 545-557.**

Google Scholar: [Author Only Title Only Author and Title](#)

**Sun, X.P., Yan, H.L., Kang, X.Y., and Ma, F.W. (2013b). Growth, gas exchange, and water-use efficiency response of two young apple cultivars to drought stress in two scion-one rootstock grafting system. *Photosynthetica* 51, 404-410.**

Google Scholar: [Author Only Title Only Author and Title](#)

**Tatham, M.H., Marie-Claude, G., Linnan, S., Anna, P., Neil, H., Jaffray, E.G., Palvimo, J.J., and Hay, R.T. (2008). RNF4 is a poly-SUMO-specific E3 ubiquitin ligase required for arsenic-induced PML degradation. *Nat Cell Biol* 10, 538-546.**

Google Scholar: [Author Only Title Only Author and Title](#)

**Valérie, L.B., Marion, J., Shirine, B., Riha, N., Ming, L., Laurent, P., Jun, Z., Jun, Z., Brian, R., and Hugues, D.T. (2008). Arsenic degrades PML or PML-RARalpha through a SUMO-triggered RNF4/ubiquitin-mediated pathway. *Nat Cell Biol* 10, 547-555.**

Google Scholar: [Author Only Title Only Author and Title](#)

**Vierstra, and R., D. (2012). The Expanding Universe of Ubiquitin and Ubiquitin-Like Modifiers. *Plant Physiol* 160, 2.**

Google Scholar: [Author Only Title Only Author and Title](#)

**Virlet, N., Costes, E., Martinez, S., Kelner, J.J., and Regnard, J.L. (2015). Multispectral airborne imagery in the field reveals genetic determinisms of morphological and transpiration traits of an apple tree hybrid population in response to water deficit. *J Exp Bot* 66, 5453-5465.**

Google Scholar: [Author Only Title Only Author and Title](#)

**Wang, F., Liu, Y., Shi, Y., Han, D., Wu, Y., Ye, W., Yang, H., Li, G., Cui, F., Wan, S., Lai, J., and Yang, C. (2020). SUMOylation stabilizes the**

**transcription factor DREB2A to improve plant thermotolerance. *Plant Physiol* 183, 41-50.**

Google Scholar: [Author Only](#) [Title Only](#) [Author and Title](#)

**Wang, H., Zhao, S., Mao, K., Dong, Q., Liang, B., Li, C., Wei, Z., Li, M., and Ma, F. (2018). Mapping QTLs for water-use efficiency reveals the potential candidate genes involved in regulating the trait in apple under drought stress. *BMC Plant Biol* 18, 136.**

Google Scholar: [Author Only](#) [Title Only](#) [Author and Title](#)

**Wei, W., Hu, Y., Han, Y.-T., Zhang, K., Zhao, F.-L., and Feng, J.-Y. (2016). The WRKY transcription factors in the diploid woodland strawberry *Fragaria vesca*: Identification and expression analysis under biotic and abiotic stresses. *Plant Physiol Biochem* 105, 129-144.**

Google Scholar: [Author Only](#) [Title Only](#) [Author and Title](#)

**Wu, S., Liang, D., and Ma, F. (2014). Leaf micromorphology and sugar may contribute to differences in drought tolerance for two apple cultivars. *Plant Physiol Biochem* 80, 249-258.**

Google Scholar: [Author Only](#) [Title Only](#) [Author and Title](#)

**Xie, Y.P., Bao, C.N., Chen, P.X., Cao, F.G., Liu, X.F., Geng, D.L., Li, Z.X., Li, X.W., Hou, N., Zhi, F., Niu, C.D., Zhou, S.X., Zhan, X.Q., Ma, F.W., and Guan, Q.M. (2020). ABA homeostasis is mediated by a feedback regulation of MdMYB88 and MdMYB124. *J Exp Bot.* eraa449.**

Google Scholar: [Author Only](#) [Title Only](#) [Author and Title](#)

**Xie, Y.P., Chen, P.X., Yan, Y., Bao, C.N., Li, X.W., Wang, L.P., Shen, X.X., Li, H., Liu, X.F., Niu, C.D., Zhu, C., Fang, N., Shao, Y., Zhao, T., Yu, J., Zhu, J., Xu, L., van Nocker, S., Ma, F.W., and Guan, Q.M. (2017). An atypical R2R3 MYB transcription factor increases cold hardiness by CBF-dependent and CBF-independent pathways in apple. *New Phytol* 218, 201-218.**

Google Scholar: [Author Only](#) [Title Only](#) [Author and Title](#)

**Xu, G., Duan, B., and Li, C. (2008). Different adaptive responses of leaf physiological and biochemical aspects to drought in two contrasting populations of seabuckthorn. *Can. J. For. Res.* 38, 584-591.**

Google Scholar: [Author Only](#) [Title Only](#) [Author and Title](#)

**Yamaguchishinozaki, K., and Shinozaki, K. (1994). A novel cis-acting element in an Arabidopsis gene is involved in responsiveness to drought, low-temperature, or high-salt stress. *Plant Cell* 6, 251-264.**

Google Scholar: [Author Only](#) [Title Only](#) [Author and Title](#)

**Yildirim, K., and Kaya, Z. (2017). Gene regulation network behind drought escape, avoidance and tolerance strategies in black poplar (*Populus nigra* L.). *Plant Physiol Biochem* 115, 183-199.**

Google Scholar: [Author Only](#) [Title Only](#) [Author and Title](#)

**Yordanov, I., Velikova, V., and Tsonev, T. (2000). Plant responses to drought, acclimation, and stress tolerance. *Photosynthetica* 38, 171-186.**

Google Scholar: [Author Only](#) [Title Only](#) [Author and Title](#)

**Zhang, L., Xie, F., Zhang, J., Dijke, P.T., and Zhou, F. (2017a). SUMO-triggered ubiquitination of NR4A1 controls macrophage cell death. *Cell Death & Differentiation* 24.**

Google Scholar: [Author Only](#) [Title Only](#) [Author and Title](#)

**Zhang, S., Qi, Y., Liu, M., and Yang, C. (2013). SUMO E3 ligase AtMMS21 regulates drought tolerance in *Arabidopsis thaliana*. *J Integr Plant Biol* 55, 83-95.**

Google Scholar: [Author Only](#) [Title Only](#) [Author and Title](#)

**Zhang, S., Zhuang, K., Wang, S., Lv, J., Ma, N.N., and Meng, Q. (2017b). A novel tomato SUMO E3 ligase, SISIZ1, confers drought tolerance in transgenic tobacco. *J Integr Plant Biol*.**

Google Scholar: [Author Only](#) [Title Only](#) [Author and Title](#)

**Zhou, L.J., Li, Y.Y., Zhang, R.F., Zhang, C.L., Xie, X.B., Zhao, C., and Hao, Y.J. (2017). The small ubiquitin-like modifier E3 ligase MdSIZ1 promotes anthocyanin accumulation by sumoylating MdMYB1 under low-temperature conditions in apple. *Plant Cell Environ* 40, 2068-2080.**

Google Scholar: [Author Only](#) [Title Only](#) [Author and Title](#)

**Zhu, J.K. (2016). Abiotic stress signaling and responses in plants. *Cell* 167, 313-324.**

Google Scholar: [Author Only](#) [Title Only](#) [Author and Title](#)
